# Supplementary material for: DNA methylation analysis of NOTCH1 variants reveals the first episignature for non-syndromic congenital heart defects
Source: Genome Med. 2026 Jan 7;18:2. doi: 10.1186/s13073-025-01587-6 (PMC12781588; doi:10.1186/s13073-025-01587-6)
Supplement: Supplementary file 1 — Additional file 1: Supplementary figures S1 to S9 including cross validation plots, annotations of differentially methylated probes, full STRING interaction network for genes overlapping the presented signature, a NOTCH1-protein plot representing the DNAm prediction scores for tested samples and figures depicting the results of in-silico modelling for cysteine-altering variants. [file 13073_2025_1587_MOESM1_ESM.xlsx]

## Sheet: Table S1
Domain or feature	Amino acid residue(s)
EGF-like repeats	20+58, 59+99, 102+139, 140+176, 178+216, 218+255, 257+293, 295+333, 335+371, 372+410, 412+450, 452+488, 490+526, 528+564, 566+601, 603+639, 641+676, 678+714, 716+751, 753+789, 791+827, 829+867, 869+905, 907+943, 945+981, 983+1019, 1021+1057, 1059+1095, 1097+1143, 1145+1181, 1183+1219, 1221+1265, 1267+1305, 1307+1346, 1348+1384, 1387+1426
DLL4-interaction	420-421, 448-452, 469
LNR	1449-1571
HD	1567-1618
PSEN-interaction	1728-1760
TM	1736-1756
RAM	1760-1858
HIF1AN-binding	1947-1955, 2014-2022
ANK	1927-1956, 1960-1990, 1994-2023, 2027-2056, 2060-2089, 2095-2122
TAD	2207-2375
PEST	2391-2555
Disulfide-bridges	24, 31, 37, 46, 48, 57, 63, 68, 74, 87, 89, 98, 106, 111, 117, 127, 129, 138, 144, 149, 155, 164, 166, 175, 182, 189, 195, 204, 206, 215, 222, 227, 233, 243, 245, 254, 261, 266, 272, 281, 283, 292, 299, 306, 312, 321, 323, 332, 339, 344, 350, 359, 361, 370, 376, 381, 387, 398, 400, 409, 416, 423, 429, 438, 440, 449, 456, 461, 467, 476, 478, 487, 494, 499, 505, 514, 516, 525, 532, 537, 543, 552, 5…
Other posttranslational modification sites	41, 65, 73, 116, 146, 194, 232, 311, 341, 349, 378, 432, 435, 452, 453, 455, 458, 466, 469, 470, 490, 491, 493, 496, 507, 508, 534, 609, 617, 647, 692, 722, 759, 767, 784, 797, 805, 900, 921, 951, 959, 997, 1027, 1035, 1065, 1159, 1179, 1189, 1197, 1241, 1273, 1317, 1362, 1379, 1402, 1457, 1460, 1475, 1478, 1489, 1587, 1725, 1795, 1821, 1861, 1955, 2022, 2157, 2160, 2164, 2171, 2174, 1677, 1791, …

## Sheet: Table S2
Term	Genename
GO:0009008 DNA-methyltransferase activity	DNMT1
GO:0009008 DNA-methyltransferase activity	DNMT3A
GO:0009008 DNA-methyltransferase activity	DNMT3B
GO:0009008 DNA-methyltransferase activity	DNMTA
GO:0009008 DNA-methyltransferase activity	DNMTB
GO:0009008 DNA-methyltransferase activity	METTL4
GO:0009008 DNA-methyltransferase activity	MGMT
GO:0009008 DNA-methyltransferase activity	N6AMT1
GO:0035514 DNA demethylase activity	ALKBH1
GO:0035514 DNA demethylase activity	ALKBH2
GO:0035514 DNA demethylase activity	ALKBH3
GO:0035514 DNA demethylase activity	ALKBH4
GO:0035514 DNA demethylase activity	FTO
GO:0140938 histone H3 methyltransferase activity	ASH1L
GO:0140938 histone H3 methyltransferase activity	BPHA1F
GO:0140938 histone H3 methyltransferase activity	CARM1
GO:0140938 histone H3 methyltransferase activity	DOT1L
GO:0140938 histone H3 methyltransferase activity	EHMT1
GO:0140938 histone H3 methyltransferase activity	EHMT2
GO:0140938 histone H3 methyltransferase activity	EZH1
GO:0140938 histone H3 methyltransferase activity	EZH2
GO:0140938 histone H3 methyltransferase activity	JARID2
GO:0140938 histone H3 methyltransferase activity	KANSL1
GO:0140938 histone H3 methyltransferase activity	KANSL2
GO:0140938 histone H3 methyltransferase activity	KANSL3
GO:0140938 histone H3 methyltransferase activity	KAT8
GO:0140938 histone H3 methyltransferase activity	KIAA0409
GO:0140938 histone H3 methyltransferase activity	KMT2A
GO:0140938 histone H3 methyltransferase activity	KMT2A
GO:0140938 histone H3 methyltransferase activity	KMT2B
GO:0140938 histone H3 methyltransferase activity	KMT2B
GO:0140938 histone H3 methyltransferase activity	KMT2C
GO:0140938 histone H3 methyltransferase activity	KMT2C
GO:0140938 histone H3 methyltransferase activity	KMT2D
GO:0140938 histone H3 methyltransferase activity	KMT2D
GO:0140938 histone H3 methyltransferase activity	KMT2E
GO:0140938 histone H3 methyltransferase activity	MCRS1
GO:0140938 histone H3 methyltransferase activity	MECOM
GO:0140938 histone H3 methyltransferase activity	NSD1
GO:0140938 histone H3 methyltransferase activity	NSD2
GO:0140938 histone H3 methyltransferase activity	NSD3
GO:0140938 histone H3 methyltransferase activity	OGT
GO:0140938 histone H3 methyltransferase activity	PHF20
GO:0140938 histone H3 methyltransferase activity	PRC2
GO:0140938 histone H3 methyltransferase activity	PRDM2
GO:0140938 histone H3 methyltransferase activity	PRDM7
GO:0140938 histone H3 methyltransferase activity	PRDM8
GO:0140938 histone H3 methyltransferase activity	PRDM9
GO:0140938 histone H3 methyltransferase activity	PRMT2
GO:0140938 histone H3 methyltransferase activity	PRMT5
GO:0140938 histone H3 methyltransferase activity	PRMT6
GO:0140938 histone H3 methyltransferase activity	SET1A
GO:0140938 histone H3 methyltransferase activity	SET1B
GO:0140938 histone H3 methyltransferase activity	SETBP1
GO:0140938 histone H3 methyltransferase activity	SETD1A
GO:0140938 histone H3 methyltransferase activity	SETD1B
GO:0140938 histone H3 methyltransferase activity	SETD2
GO:0140938 histone H3 methyltransferase activity	SETD3
GO:0140938 histone H3 methyltransferase activity	SETD4
GO:0140938 histone H3 methyltransferase activity	SETD5
GO:0140938 histone H3 methyltransferase activity	SETD7
GO:0140938 histone H3 methyltransferase activity	SETDB1
GO:0140938 histone H3 methyltransferase activity	SETDB2
GO:0140938 histone H3 methyltransferase activity	SMYD1
GO:0140938 histone H3 methyltransferase activity	SMYD2
GO:0140938 histone H3 methyltransferase activity	SMYD3
GO:0140938 histone H3 methyltransferase activity	SMYD5
GO:0140938 histone H3 methyltransferase activity	SUV39H1
GO:0140938 histone H3 methyltransferase activity	SUV39H2
GO:0140938 histone H3 methyltransferase activity	WDR5
GO:0140939 histone H4 methyltransferase activity	HEMK2
GO:0140939 histone H4 methyltransferase activity	KMT5A
GO:0140939 histone H4 methyltransferase activity	KMT5B
GO:0140939 histone H4 methyltransferase activity	KMT5C
GO:0140939 histone H4 methyltransferase activity	N6AMT1
GO:0140939 histone H4 methyltransferase activity	NSD1
GO:0140939 histone H4 methyltransferase activity	NSD2
GO:0140939 histone H4 methyltransferase activity	PRDM9
GO:0140939 histone H4 methyltransferase activity	PRMT1
GO:0140939 histone H4 methyltransferase activity	PRMT3
GO:0140939 histone H4 methyltransferase activity	PRMT5
GO:0140939 histone H4 methyltransferase activity	PRMT7
GO:0140939 histone H4 methyltransferase activity	PRMT8
GO:0140939 histone H4 methyltransferase activity	SETD4
GO:0140939 histone H4 methyltransferase activity	SMYD3
GO:0140939 histone H4 methyltransferase activity	SMYD5
GO:0140939 histone H4 methyltransferase activity	TP53BP1
GO:0140939 histone H4 methyltransferase activity	TRMT112
GO:0140939 histone H4 methyltransferase activity	TTLL12
GO:0140940 histone H2A methyltransferase activity	FBL
GO:0140940 histone H2A methyltransferase activity	FBLL1
GO:0140940 histone H2A methyltransferase activity	PRMT6

## Sheet: Table S3
Variant type	Paper	doi	reported variant	reported phenotype	group	ligand binding site	disulfide-altering PAV?
PAV	Alankarage et al. 2019	10.1038/s41436-018-0296-x	c.4416C>G p.1472C/W	malformation of the outflow tract (DORV;PS,VSD); digit anomalies, cutis marmorata	AOS		TRUE
PTV	Alankarage et al. 2019	10.1038/s41436-018-0296-x	c.5865del p.1955N/X	syndromic functional single ventricle	CHD
PTV	Alankarage et al. 2019	10.1038/s41436-018-0296-x	c.6105del p. 2036A/X	outflow tract malformation	CHD
PAV	Bai et al. 2020	10.1186/s12881-020-01058-2	c.4574C>T p.1438R/C	pregnancy related Spontaneous coronary artery dissection	CHD
SV/ CNV	Bansal et al. 2014	10.1371/journal.pone.0085375	Chr9:139402477_139404228_dup (hg37; Exons 18-21 of NOTCH1)	TOF	CHD
PAV	Blue et al. 2016	10.1016/j.ijcard.2016.12.024	c.3835C>T p.1279R/C	4 CHD-cases (3xASDII, 1xPFO)	CHD
PTV	Boerkoel et al. 2022	10.1002/ajmg.a.63167	c.6626_6629del p.2209Y/X	Cardiomegaly, ASD, PV dysplasia, dilated thoracic aorta and various ECA	CHD
PAV	Bonachea et al. 2014	10.1186/1755-8794-7-56	c.6481C>T p.2161P/S	BAV, male caucasian, no family history	CHD
PAV	Chapman et al. 2019	10.1093/hmg/ddz270	c.2153A>G p.718N/S	2 CHD-cases (VSD, MV)	CHD
SV/ CNV	Chapman et al. 2019	10.1093/hmg/ddz270	Deletion Exon 1-2	SDMA	CHD
PAV	Dargis et al. 2016	10.1016/j.amjcard.2015.10.058	c.3836C>T p.1279R/H	BAV	CHD
PAV	Dargis et al. 2016	10.1016/j.amjcard.2015.10.058	c.4028G>A p.1343A/V	BAV	CHD
PAV	Dargis et al. 2016	10.1016/j.amjcard.2015.10.058	c.4472G>A p.1491T/M	BAV	CHD
PAV	Dargis et al. 2016	10.1016/j.amjcard.2015.10.058	c.454C>T p.152G/S	BAV	CHD
Promoter	Dargis et al. 2016	10.1016/j.amjcard.2015.10.058	Chr9:136546393G>A (hg38)	BAV	CHD
Promoter	Dargis et al. 2016	10.1016/j.amjcard.2015.10.058	Chr9:136546400A>G (hg38)	BAV	CHD
PTV	Daum et al. 2020	10.1002/ajmg.a.61511	c.5385-1G>A Splicevariant	2 CHD-cases (HLHS, PAPVD+AS+Cor Triatriatrium)	CHD
PTV	Debiec et al. 2020	10.1002/mgg3.1437	c.873C>G p.291Y/*	3 CHD-cases (VSD; BAV)	CHD
PAV	Digilio et al. 2019	10.1002/ajmg.a.61195	c.2734C>T p.912R/W	HLHS (in sibling), “apple peel” intestinal atresia	CHD
PAV	Dudoignon et al. 2019	10.1002/ajmg.a.61364	c.1246T>A p.416C/S	2cases: 1xAOS, 1xAOS with Pulmonary artery stenosis	AOS	TRUE	TRUE
PAV	Dudoignon et al. 2019	10.1002/ajmg.a.61364	c.1364A>T p.455E/V	2cases: 1xAOS, 1xAOS with Pulmonary hypertension	AOS	TRUE
PAV	Dudoignon et al. 2019	10.1002/ajmg.a.61364	c.1732G>C p.578G/A	2x AOS with septal defect	AOS
PTV	Dudoignon et al. 2019	10.1002/ajmg.a.61364	c.2346del p.783F/X	AOS with Septal defect defect and auricular septal defect	AOS
PAV	Dudoignon et al. 2019	10.1002/ajmg.a.61364	c.3319C>T p.1107A	AOS with CoA & auricular Septal defect	AOS
PTV	Foffa et al. 2013	10.1186/1471-2350-14-44	c.4856C>G p.1619Y/X	bicuspid_x000D__x000D__x000D__x000D_ aortic valve; At age 6 months_x000D__x000D__x000D__x000D_ the proband had surgery to correct the CoA, while at_x000D__x000D__x000D__x000D_ age 25 years he underwent elective aortic valve_x000D__x000D__x000D__x000D_ replacement.	CHD
PAV	Foffa et al. 2013	10.1186/1471-2350-14-44	c.851C>T p.284P/L	severe_x000D__x000D__x000D__x000D_ calcified aortic valve and normal diameter of ascending_x000D__x000D__x000D__x000D_ aorta (39 mm), bicuspid_x000D__x000D__x000D__x000D_ aortic valve	CHD
PTV	Garg et al. 2005	10.1038/nature03940	c.4515 p.1505H/X	3 CHD-cases (BAV |mitral valve_x000D__x000D__x000D__x000D_ atresia, hypoplastic left ventricle;double-outlet right ventricle|_x000D__x000D__x000D__x000D_ aortic valve calcification and_x000D__x000D__x000D__x000D_ stenosis|ascending aortic aneurysm_x000D__x000D__x000D__x000D_ but no aortic valve disease)	CHD
PTV	Garg et al. 2005	10.1038/nature03940	p.1107R/X	7 CHD-cases (AI, AS BAV, TOF, VSD)	CHD
PAV	Gillis et al. 2017	10.3389/fphys.2017.00400	c.121A>G p.41N/D	2 CHD-cases: 1xBAV 1xTAV	CHD
PAV	Gillis et al. 2017	10.3389/fphys.2017.00400	c.1951G>A p.651N/D	BAV	CHD
PAV	Gillis et al. 2017	10.3389/fphys.2017.00400	c.2003C>T p.668P/L	4 cases with BAV	CHD
PAV	Gillis et al. 2017	10.3389/fphys.2017.00400	c.4013C>T p.1338A/V	2x BAV	CHD
PAV	Gillis et al. 2017	10.3389/fphys.2017.00400	c.4021G>A p.1341E/K	2x BAV	CHD
PAV	Gillis et al. 2017	10.3389/fphys.2017.00400	c.5047C>T p.1683R/W	BAV	CHD
PTV	Gillis et al. 2017	10.3389/fphys.2017.00400	c.5167+3_5167+6del	BAV	CHD
PAV	Gillis et al. 2017	10.3389/fphys.2017.00400	c.5248G>A p.1750V/M	BAV	CHD
PAV	Gillis et al. 2017	10.3389/fphys.2017.00400	c.5273G>A p.1758R/H	2x BAV	CHD
PAV	Gillis et al. 2017	10.3389/fphys.2017.00400	c.5414T>C p.1805L/P	2x BAV	CHD
PAV	Gillis et al. 2017	10.3389/fphys.2017.00400	c.6413C>T p.2138P/L	BAV	CHD
PAV	Gillis et al. 2017	10.3389/fphys.2017.00400	c.7361A>G p.2454H/R	2x BAV	CHD
PAV	Gillis et al. 2017	10.3389/fphys.2017.00400	c.7372C>A p.2458P/T	2x BAV	CHD
PAV	Gillis et al. 2017	10.3389/fphys.2017.00400	c.800A>G p.267K/R	2x BAV	CHD
PAV	Gillis et al. 2017	10.3389/fphys.2017.00400	c.983C>G p.328T/S	BAV	CHD
PTV	Helle et al. 2019	10.1002/gepi.22176	c.1077C>A p.359C/*	HLHS	CHD
PTV	Helle et al. 2019	10.1002/gepi.22176	c.1650_1651insA p.550Y/*	HLHS, CoA	CHD
PTV	Helle et al. 2019	10.1002/gepi.22176	c.2741-1G>A p.?	HLHS	CHD
PAV	Helle et al. 2019	10.1002/gepi.22176	c.3836G>A p.1279R/H	6 CHD-cases (5 HLHS, 1 BAV)	CHD
PAV	Helle et al. 2019	10.1002/gepi.22176	c.3853G>A p.1285V/M	HLHS	CHD
PAV	Helle et al. 2019	10.1002/gepi.22176	c.6853G>A p.2285V/I	HLHS	CHD
PAV	Helle et al. 2019	10.1002/gepi.22176	c.7178A>G p.2393Q/R	HLHS, BAV, CoA, HAA, ASD, VSD	CHD
PAV	Huang et al. 2019	10.1089/dna.2019.5200	c.1292_1294del p.431N/-	AOS	CHD
PAV	Iascone et al. 2011	10.1111/j.1399-0004.2011.01674.x	c.4028G>A p.1343A/V	HLHS	CHD
PAV	Iascone et al. 2011	10.1111/j.1399-0004.2011.01674.x	c.4129C>T p.1377P/S	2x HLHS	CHD
PAV	Iascone et al. 2011	10.1111/j.1399-0004.2011.01674.x	c.6853G>A p.2285V/I	HLHS	CHD
PTV	Iascone et al. 2011	10.1111/j.1399-0004.2011.01674.x	c.742+1G>A p.?	2x HLHS	CHD
PAV	Iascone et al. 2011	10.1111/j.1399-0004.2011.01674.x	p.1080Q/R	HLHS	CHD
PAV	Iascone et al. 2011	10.1111/j.1399-0004.2011.01674.x	p.1279R/H	3x HLHS	CHD
PTV	Iascone et al. 2011	10.1111/j.1399-0004.2011.01674.x	p.136K/X	HLHS	CHD
PAV	Iascone et al. 2011	10.1111/j.1399-0004.2011.01674.x	p.1476G/D	HLHS	CHD
PAV	Iascone et al. 2011	10.1111/j.1399-0004.2011.01674.x	p.1493S/P	HLHS	CHD
PTV	Jia et al. 2015	10.1002/ajmg.a.37108	c.2014 + 1G>A p.?	2 CHD-cases (DORV/TGA/PS/HLHS)	CHD
PAV	Jia et al. 2015	10.1002/ajmg.a.37108	c.4129C>T p.1377P/S	PDA	CHD
PAV	Jia et al. 2015	10.1002/ajmg.a.37108	c.5061G>T p.1687Q/H	COA/AS/HLHS	CHD
PTV	Jia et al. 2015	10.1002/ajmg.a.37108	c.5281del p.1761R/Gfs*37	3 CHD-cases (HLHS/COA/AS/MS)	CHD
PAV	Jia et al. 2015	10.1002/ajmg.a.37108	c.5332G>C p.1778A/P	ASD VSD	CHD
PAV	Jia et al. 2015	10.1002/ajmg.a.37108	c.6685G>A p.2229V/M	TOF	CHD
PAV	Kalayinia et al. 2019	10.1002/jcla.23147	c.6797T>C p.2266F/S	1x VSD, brother with PDA +AVSD	CHD
PTV	Kerstjens et al. 2016	10.1038/gim.2015.193	c.1650C>G p.550Y/*	11 CHD-cases (AVS;BAV;MVR;TOF;VSD;TAPVR;PFO;ASD)	CHD
PTV	Kerstjens et al. 2016	10.1038/gim.2015.193	c.1670-7G>A p.557G/X	4 CHD-cases (BAV;AVS;AVR;MI;PVS;VSD;HCM)	CHD
PTV	Kerstjens et al. 2016	10.1038/gim.2015.193	c.1904-2A>G p.?	2 CHD-cases (BAV;AVS;TOF)	CHD
PTV	Kerstjens et al. 2016	10.1038/gim.2015.193	c.2425delG p.809D/X	BAV,AVS, MVS, CoA	CHD
PTV	Kerstjens et al. 2016	10.1038/gim.2015.193	c.2643delC p.882A/X	3 CHD-cases (AVS;BAV; PA-IVS;TA; HRV; ASDII; PDA)	CHD
PTV	Kerstjens et al. 2016	10.1038/gim.2015.193	c.3054C>A p.1018C/*	HLHS	CHD
PTV	Kerstjens et al. 2016	10.1038/gim.2015.193	c.3511-2A>G p.?	3 CHD-cases (AVS; PVS, BAV)	CHD
PAV	Kerstjens et al. 2016	10.1038/gim.2015.193	c.3787C>T p.1262_1301del	2 CHD-cases (1xBAV+LNVC, 1xPDA)	CHD
PTV	Kerstjens et al. 2016	10.1038/gim.2015.193	c.4240delT p.1414C/X	AVS;AVR;TAA;TOF;PA (not all tested)	CHD
PTV	Kerstjens et al. 2016	10.1038/gim.2015.193	c.5529G>A p.1843W/*	3 CHD-cases (AVI;PA;VSD;COA;BAV;MVS;MI)	CHD
PTV	Kerstjens et al. 2016	10.1038/gim.2015.193	c.5950C>T p.1984R/*	AVS;TAA	CHD
PTV	Kerstjens et al. 2016	10.1038/gim.2015.193	c.7455dupC p.2486S/X	2 CHD-cases (BAV;PVS;TA)	CHD
PTV	Kerstjens et al. 2016	10.1038/gim.2015.193	c.865+2C>A p.?	7 CHD-cases (BAV, TAA; PA; VSD, TAV, dysplastic TV)	CHD
SV/ CNV	Kerstjens et al. 2016	10.1038/gim.2015.193	Deletion of full NOTCH1 gene	HLHS	CHD
SV/ CNV	Luo et al. 2021	10.3389/fcvm.2021.631374	Del9q34.3	Small left heart, coaractation of aortic arch, ascending arota, small VSD	CHD
PAV	Manshaei et al. 2020	10.3389/fgene.2020.00957	c.1243G>A p.415E/K	TOF	CHD	TRUE
PAV	Manshaei et al. 2020	10.3389/fgene.2020.00957	c.1816G>A p.606E/K	TOF	CHD
PAV	Manshaei et al. 2020	10.3389/fgene.2020.00957	c.1869C>A p.623N/K	TOF	CHD
PAV	Manshaei et al. 2020	10.3389/fgene.2020.00957	c.2045G>A p.682C/Y	TOF	CHD		TRUE
PAV	Manshaei et al. 2020	10.3389/fgene.2020.00957	c.2128G>A p.710D/N	TOF	CHD
PAV	Manshaei et al. 2020	10.3389/fgene.2020.00957	c.2444G>A p.815C/Y	TOF	CHD		TRUE
PAV	Manshaei et al. 2020	10.3389/fgene.2020.00957	c.4606T>C p.1536C/R	TOF	CHD		TRUE
PAV	Manshaei et al. 2020	10.3389/fgene.2020.00957	c.847T>G p.283C/G	TOF	CHD		TRUE
PAV	McKellar et al. 2007	10.1016/j.jtcvs.2007.02.041	c.4028G>A p.1343A/V	BAV	CHD
PAV	McKellar et al. 2007	10.1016/j.jtcvs.2007.02.041	c.4049G>T p.1350R/L	BAV	CHD
PAV	McKellar et al. 2007	10.1016/j.jtcvs.2007.02.041	c.4129C>T p.1377P/S	3x BAV	CHD
PAV	McKellar et al. 2007	10.1016/j.jtcvs.2007.02.041	c.4168C>A p.1390P/T	BAV	CHD
PAV	Meester et al. 2018	10.1002/humu.23567	c.4549G > A p.1517D/N	AOS, no CHD	AOS
PAV	Mohamed et al. 2006	10.1016/j.bbrc.2006.05.046	c.4129C>T p.1377P/S	BAV	CHD
PAV	Mohamed et al. 2006	10.1016/j.bbrc.2006.05.046	c.6853G>A p.2285V/I	BAV	CHD
PAV	Mohamed et al. 2006	10.1016/j.bbrc.2006.05.046	p.1796P/H	valve and_x000D__x000D__x000D__x000D_ aortic ring calcification (stenosis grade I and insufficiency_x000D__x000D__x000D__x000D_ grade I) with fusioned left and right cusps and coexisting_x000D__x000D__x000D__x000D_ ascending aortic aneurysm of 53 mm, BAV	CHD
PAV	Mohamed et al. 2006	10.1016/j.bbrc.2006.05.046	p.596T/M	showed fusioned_x000D__x000D__x000D__x000D_ left-right and right-acoronary cusps and coexisting ascending_x000D__x000D__x000D__x000D_ aortic aneurysm of 47 mm. In addition, the aortic valve_x000D__x000D__x000D__x000D_ was calicified (stenosis grade I) and insufficient (insufficiency_x000D__x000D__x000D__x000D_ grade I).BAV	CHD
PAV	Musfee et al. 2020	10.1002/mgg3.1406	p.1023N/S	HTAD (heritable thoracic aortic aneurysms predisposing to acute aortic dissections)	TAAD
PAV	Musfee et al. 2020	10.1002/mgg3.1406	p.1133C/G	HTAD (heritable thoracic aortic aneurysms predisposing to acute aortic dissections)	TAAD		TRUE
PAV	Musfee et al. 2020	10.1002/mgg3.1406	p.1279R/C	HTAD (heritable thoracic aortic aneurysms predisposing to acute aortic dissections)	TAAD
PAV	Musfee et al. 2020	10.1002/mgg3.1406	p.128R/H	HTAD (heritable thoracic aortic aneurysms predisposing to acute aortic dissections)	TAAD
PAV	Musfee et al. 2020	10.1002/mgg3.1406	p.1337P/R	HTAD (heritable thoracic aortic aneurysms predisposing to acute aortic dissections)	TAAD
PAV	Musfee et al. 2020	10.1002/mgg3.1406	p.1343A/V	HTAD (heritable thoracic aortic aneurysms predisposing to acute aortic dissections)	TAAD
PAV	Musfee et al. 2020	10.1002/mgg3.1406	p.1439D/N	HTAD (heritable thoracic aortic aneurysms predisposing to acute aortic dissections)	TAAD
PAV	Musfee et al. 2020	10.1002/mgg3.1406	p.1573T/M	HTAD (heritable thoracic aortic aneurysms predisposing to acute aortic dissections)	TAAD
PAV	Musfee et al. 2020	10.1002/mgg3.1406	p.1633R/H	HTAD (heritable thoracic aortic aneurysms predisposing to acute aortic dissections)	TAAD
PAV	Musfee et al. 2020	10.1002/mgg3.1406	p.1691Q/H	HTAD (heritable thoracic aortic aneurysms predisposing to acute aortic dissections)	TAAD
PAV	Musfee et al. 2020	10.1002/mgg3.1406	p.1813W/L	HTAD (heritable thoracic aortic aneurysms predisposing to acute aortic dissections)	TAAD
PAV	Musfee et al. 2020	10.1002/mgg3.1406	p.2122P/L	HTAD (heritable thoracic aortic aneurysms predisposing to acute aortic dissections)	TAAD
PAV	Musfee et al. 2020	10.1002/mgg3.1406	p.234R/H	HTAD (heritable thoracic aortic aneurysms predisposing to acute aortic dissections)	TAAD
PAV	Musfee et al. 2020	10.1002/mgg3.1406	p.2372R/Q	HTAD (heritable thoracic aortic aneurysms predisposing to acute aortic dissections)	TAAD
PAV	Musfee et al. 2020	10.1002/mgg3.1406	p.5404R/H	HTAD (heritable thoracic aortic aneurysms predisposing to acute aortic dissections)	TAAD
PAV	Musfee et al. 2020	10.1002/mgg3.1406	p.586T/I	HTAD (heritable thoracic aortic aneurysms predisposing to acute aortic dissections)	TAAD
PAV	Musfee et al. 2020	10.1002/mgg3.1406	p.624A/T	HTAD (heritable thoracic aortic aneurysms predisposing to acute aortic dissections)	TAAD
PAV	Musfee et al. 2020	10.1002/mgg3.1406	p.842G/-	HTAD (heritable thoracic aortic aneurysms predisposing to acute aortic dissections)	TAAD
PAV	Musfee et al. 2020	10.1002/mgg3.1406	p.892R/H	HTAD (heritable thoracic aortic aneurysms predisposing to acute aortic dissections)	TAAD
PAV	Musfee et al. 2020	10.1002/mgg3.1406	p.912R/W	HTAD (heritable thoracic aortic aneurysms predisposing to acute aortic dissections)	TAAD
PAV	Musfee et al. 2020	10.1002/mgg3.1406	p.939G/S	BAV	CHD
PAV	Overwater et al. 2018	10.1002/humu.23565	c.2123A > G p.708Y/C	thoracic aortic dirsorder (aneurysm)	TAAD
PAV	Page et al. 2018	10.1161/CIRCRESAHA.118.313250	c.3271G>A p.1091G/S	non-syndromic TOF	CHD
PAV	Page et al. 2018	10.1161/CIRCRESAHA.118.313250	c.4025G>A p.1342G/D	non-syndromic TOF	CHD
PAV	Page et al. 2018	10.1161/CIRCRESAHA.118.313250	c.4031C>T p.1344T/M	non-syndromic TOF	CHD
PAV	Page et al. 2018	10.1161/CIRCRESAHA.118.313250	c.5387C>A p.1796P/H	non-syndromic TOF	CHD
PAV	Page et al. 2018	10.1161/CIRCRESAHA.118.313250	c.5624A>G p.1875N/S	non-syndromic TOF	CHD
PAV	Page et al. 2018	10.1161/CIRCRESAHA.118.313250	c.6106G>A p.2036A/T	non-syndromic TOF	CHD
PTV	Page et al. 2018	10.1161/CIRCRESAHA.118.313250	p.115G/X	non-syndromic TOF	CHD
PAV	Page et al. 2018	10.1161/CIRCRESAHA.118.313250	p.1294E/K	non-syndromic TOF	CHD
PTV	Page et al. 2018	10.1161/CIRCRESAHA.118.313250	p.1322C/X	non-syndromic TOF	CHD
PAV	Page et al. 2018	10.1161/CIRCRESAHA.118.313250	p.1325A/V	non-syndromic TOF	CHD
PAV	Page et al. 2018	10.1161/CIRCRESAHA.118.313250	p.143P/L	non-syndromic TOF	CHD
PTV	Page et al. 2018	10.1161/CIRCRESAHA.118.313250	p.147N/X	non-syndromic TOF	CHD
PAV	Page et al. 2018	10.1161/CIRCRESAHA.118.313250	p.1495Q/K	non-syndromic TOF	CHD
PAV	Page et al. 2018	10.1161/CIRCRESAHA.118.313250	p.151N/S	non-syndromic TOF	CHD
PAV	Page et al. 2018	10.1161/CIRCRESAHA.118.313250	p.1549C/Y	non-syndromic TOF	CHD		TRUE
PTV	Page et al. 2018	10.1161/CIRCRESAHA.118.313250	p.1638W/*	non-syndromic TOF	CHD
PAV	Page et al. 2018	10.1161/CIRCRESAHA.118.313250	p.1673G/R	non-syndromic TOF	CHD
PTV	Page et al. 2018	10.1161/CIRCRESAHA.118.313250	p.1733Q/*	non-syndromic TOF	CHD
PAV	Page et al. 2018	10.1161/CIRCRESAHA.118.313250	p.182C/Y	non-syndromic TOF	CHD		TRUE
PAV	Page et al. 2018	10.1161/CIRCRESAHA.118.313250	p.1833D/H	non-syndromic TOF	CHD
PAV	Page et al. 2018	10.1161/CIRCRESAHA.118.313250	p.193G/A	non-syndromic TOF	CHD
PAV	Page et al. 2018	10.1161/CIRCRESAHA.118.313250	p.2004R/L	non-syndromic TOF	CHD
PAV	Page et al. 2018	10.1161/CIRCRESAHA.118.313250	p.200G/R	non-syndromic TOF	CHD
PAV	Page et al. 2018	10.1161/CIRCRESAHA.118.313250	p.200G/V	non-syndromic TOF	CHD
PAV	Page et al. 2018	10.1161/CIRCRESAHA.118.313250	p.211T/S	non-syndromic TOF	CHD
PAV	Page et al. 2018	10.1161/CIRCRESAHA.118.313250	p.2327R/Q	non-syndromic TOF	CHD
PAV	Page et al. 2018	10.1161/CIRCRESAHA.118.313250	p.2372R/Q	non-syndromic TOF	CHD
PAV	Page et al. 2018	10.1161/CIRCRESAHA.118.313250	p.292C/Y	non-syndromic TOF	CHD		TRUE
PAV	Page et al. 2018	10.1161/CIRCRESAHA.118.313250	p.353R/C	non-syndromic TOF	CHD
PAV	Page et al. 2018	10.1161/CIRCRESAHA.118.313250	p.407P/L	non-syndromic TOF	CHD
PAV	Page et al. 2018	10.1161/CIRCRESAHA.118.313250	p.432T/M	non-syndromic TOF	CHD
PTV	Page et al. 2018	10.1161/CIRCRESAHA.118.313250	p.448R/*	non-syndromic TOF	CHD
PAV	Page et al. 2018	10.1161/CIRCRESAHA.118.313250	p.471I/N	non-syndromic TOF	CHD	TRUE
PAV	Page et al. 2018	10.1161/CIRCRESAHA.118.313250	p.481G/S	non-syndromic TOF	CHD
PAV	Page et al. 2018	10.1161/CIRCRESAHA.118.313250	p.53V/M	non-syndromic TOF	CHD
PAV	Page et al. 2018	10.1161/CIRCRESAHA.118.313250	p.540G/D	non-syndromic TOF	CHD
PAV	Page et al. 2018	10.1161/CIRCRESAHA.118.313250	p.563C/R	non-syndromic TOF	CHD		TRUE
PAV	Page et al. 2018	10.1161/CIRCRESAHA.118.313250	p.580C/Y	non-syndromic TOF	CHD		TRUE
PAV	Page et al. 2018	10.1161/CIRCRESAHA.118.313250	p.601E/K	non-syndromic TOF	CHD
PAV	Page et al. 2018	10.1161/CIRCRESAHA.118.313250	p.607C/Y	non-syndromic TOF	CHD		TRUE
PAV	Page et al. 2018	10.1161/CIRCRESAHA.118.313250	p.624A/T	non-syndromic TOF	CHD
PAV	Page et al. 2018	10.1161/CIRCRESAHA.118.313250	p.645C/Y	non-syndromic TOF	CHD		TRUE
PAV	Page et al. 2018	10.1161/CIRCRESAHA.118.313250	p.663E/K	non-syndromic TOF	CHD
PAV	Page et al. 2018	10.1161/CIRCRESAHA.118.313250	p.71A/T	non-syndromic TOF	CHD
PAV	Page et al. 2018	10.1161/CIRCRESAHA.118.313250	p.72G/R	non-syndromic TOF	CHD
PAV	Page et al. 2018	10.1161/CIRCRESAHA.118.313250	p.984T/M	non-syndromic TOF	CHD
PTV	Preuss et al. 2016	10.1371/journal.pgen.1006335	c.2439C>G p.813Y/*	2 CHD-cases (BAV, TOF, Dilation of the ascending aorta)	CHD
PTV	Preuss et al. 2016	10.1371/journal.pgen.1006335	c.3765C>A p.1255C/*	7 CHD-cases (BAV and severe aortic stenosis|valve dysfunction_x000D__x000D__x000D__x000D_ and a bicuspid aortic valve|sons: TOF, not tested)	CHD
PAV	Preuss et al. 2016	10.1371/journal.pgen.1006335	c.578G>A + c.3860G>A p.193G/D + 1287R/H	3 CHD-cases (BAV, TOF, Dilation of the ascending aorta)	CHD
PAV	Priest et al. 2016	10.1371/journal.pgen.1005963	p.2285V/I +p.R509H	AVSD	CHD
PAV	Pulignani et al. 2018	10.1007/s00246-018-1806-y	c.5011G>A p.1671V/I	CoA	CHD
PAV	Pulignani et al. 2018	10.1007/s00246-018-1806-y	c.6949G>T p.2317G/C	PS	CHD
PAV	Shi et al. 2020	10.1097/MD.0000000000021355	c.1023C>A p.341S/R	Hypoplastic coronary artery	CHD
PAV	Southgate et al. 2015	10.1161/CIRCGENETICS.115.001086	c.1220C>G p.407P/R	AOS	AOS
PAV	Southgate et al. 2015	10.1161/CIRCGENETICS.115.001086	c.1343G>A p.448R/Q	2x AOS	AOS	TRUE
PAV	Southgate et al. 2015	10.1161/CIRCGENETICS.115.001086	c.1345T>C p.449C/R	AOS	AOS	TRUE	TRUE
PAV	Southgate et al. 2015	10.1161/CIRCGENETICS.115.001086	c.1367G>A p.456C/Y	AOS	AOS	TRUE	TRUE
PTV	Southgate et al. 2015	10.1161/CIRCGENETICS.115.001086	c.1649dupA p.550Y/*	5xAOS	AOS
PAV	Southgate et al. 2015	10.1161/CIRCGENETICS.115.001086	c.4120T>C p.1374C/R	2x AOS	AOS		TRUE
PTV	Southgate et al. 2015	10.1161/CIRCGENETICS.115.001086	c.4663G>T p.1555E/*	2x AOS	AOS
PTV	Southgate et al. 2015	10.1161/CIRCGENETICS.115.001086	c.4739dupT p.1580M/X	AOS	AOS
PAV	Southgate et al. 2015	10.1161/CIRCGENETICS.115.001086	c.5218G>T p.1740A/S	AOS	AOS
PTV	Southgate et al. 2015	10.1161/CIRCGENETICS.115.001086	c.6049_6050del p.2017S/X	AOS	AOS
PTV	Stanley et al. 2024	10.1038/s41431-024-01629-4	c.13_14dupCT p.6A/X	AOS	AOS
PTV	Stanley et al. 2024	10.1038/s41431-024-01629-4	c.141-1G>C p.?	AOS	AOS
PAV	Stanley et al. 2024	10.1038/s41431-024-01629-4	c.2995G>A p.999V/M	AOS	AOS
PTV	Stanley et al. 2024	10.1038/s41431-024-01629-4	c.3654T>A p.1218C/*	AOS	AOS
PAV	Stanley et al. 2024	10.1038/s41431-024-01629-4	c.4415G>A p.1472C/Y	AOS	AOS		TRUE
PTV	Stanley et al. 2024	10.1038/s41431-024-01629-4	c.4579C>T p.1527Q/*	AOS	AOS
PTV	Stanley et al. 2024	10.1038/s41431-024-01629-4	c.5349del p.1784R/X	AOS	AOS
PTV	Stanley et al. 2024	10.1038/s41431-024-01629-4	c.568C>T p.190R/C	AOS	AOS
PTV	Stanley et al. 2024	10.1038/s41431-024-01629-4	c.5814C>G p.1938Y/*	AOS	AOS
PTV	Stanley et al. 2024	10.1038/s41431-024-01629-4	c.866-2A>G p.?	AOS	AOS
SV/ CNV	Stanley et al. 2024	10.1038/s41431-024-01629-4	Del9q34.3-9q34.3 (Deletion of full NOTCH1 gene)	AOS	AOS
PAV	Sticchi et al. 2018	10.1155/2018/8386123	c.5215G>A p.1739V/M	BAV,aortic root dilatation, asc. Aorta dilatation,connective tissue disorder	CHD
SV/ CNV	Stittrich et al. 2014	10.1016/j.ajhg.2014.07.011	85kb Deletion involving NOTCH1	AOS	AOS
PAV	Stittrich et al. 2014	10.1016/j.ajhg.2014.07.011	c.1285T>C p.429C/R	AOS	AOS		TRUE
PAV	Stittrich et al. 2014	10.1016/j.ajhg.2014.07.011	c.4487G>A p.1496C/Y	AOS	AOS		TRUE
PAV	Stittrich et al. 2014	10.1016/j.ajhg.2014.07.011	c.5965G>A p.1989D/N	AOS	AOS
PTV	Stittrich et al. 2014	10.1016/j.ajhg.2014.07.011	c.743-1G>T p.?	2x AOS	AOS
PTV	Sun et al. 2020	10.1002/uog.21883	c.2452dupC p.818L/X	HLHS	CHD
PTV	Sun et al. 2020	10.1002/uog.21883	c.3643+1G>A p.?	CoA	CHD
PTV	Sun et al. 2020	10.1002/uog.21883	c.4015-2A>G p.?	HLHS	CHD
PTV	Sun et al. 2020	10.1002/uog.21883	c.4837C>T p.1613Q/*	AS	CHD
PAV	Theis et al. 2015	10.1007/s00439-015-1582-1	c.5981C>T p.1256P/L, c.3767C>T p.1964P/L	HLHS	CHD
PAV	Theis et al. 2015	10.1007/s00439-015-1582-1	c.5981C>T p.1964P/L	3 CHD-cases (2xBAV, 1x HLHS with_x000D__x000D__x000D__x000D_ severe mitral stenosis, aortic valve atresia, slit-like left_x000D__x000D__x000D__x000D_ ventricular cavity, and hypoplastic ascending aorta)	CHD
PAV	Torre-Juan et al. 2023	10.3390/ijms24108644	c.844C>T p.282R/C	non-syndromic aneurysm of the ascending aorta	TAAD
SV/ CNV	Torre-Juan et al. 2023	10.3390/ijms24108644	Chr9:136.508.773–136.625.728_del (hg38; Exons 1-18 of NOTCH1)	tricuspid AV with mild double lesion and no aortic dilatation, ascending aortic dilation of 43 mm, MV prolapse with mild mitral regurgitation and double aortic lesion with light stenosis and severe regurgitation, resulting in moderate left ventricular enlargement; suspicion of Marfan syndrome (MS)	CHD
PAV	Wu et al. 2020	10.1007/s00380-020-01710-0	c.3679C>T p.1227P/S	BAV	CHD
PAV	Yaoita et al. 2024	10.1038/s10038-024-01223-y	c.545G>A p.182C/Y	Truncus arteriosus	CHD		TRUE
PTV	Yi et al. 2023	10.1002/ehf2.14209	c.4015-2A>G ?	LVOTO	CHD
PAV	Zhou_2023	10.1002/pd.6290	c.1724G>C p.575C/S	2 cases; persistent truncus arteriosus and PA/VSD	CHD		TRUE
				2 cases; persistent truncus arteriosus and pulmonary atresia/ventricular septal defect

## Sheet: Table S4
Model from AlphaFold3	Regions used to perform PyRosetta		Disufidebonds
AF3_1_290_c206f_r207c_model_0.cif	140-256	C206F_R207C_mut.pdb	144-155, 149-174, 166-175, 182-195, 189-204, 207-215, 222-233, 227-243, 245-254
AF3_1_290_model_0.cif	140-256	C206F_R207C_org.pdb	144-155, 149-174, 166-175, 182-195, 189-204, 206-215, 222-233, 227-243, 245-254
AF3_1_640_c266f_model_0.cif	217-334	C266F_mut.pdb	222-233, 227-243, 245-254, 261-272, 283-292, 299-312, 306-321, 323-332
AF3_1_640_model_0.cif	217-334	C266F_org.pdb	222-233, 227-243, 245-254, 261-272, 266-281, 283-292, 299-312, 306-321, 323-332
AF3_1_640_c332y_model_0.cif	256-371	C332Y_mut.pdb	261-272, 266-281, 283-292, 299-312, 306-321, 339-350, 344-359, 361-370
AF3_1_640_model_0.cif	256-371	C332Y_org.pdb	261-272, 266-281, 283-292, 299-312, 306-321, 323-332, 339-350, 344-359, 361-370
AF3_1_640_c552y_model_0.cif	489-602	C552Y_mut.pdb	494-505, 499-514, 516-525, 532-543, 554-563, 570-580, 575-589, 591-600
AF3_1_640_model_0.cif	489-602	C552Y_org.pdb	494-505, 499-514, 516-525, 532-543, 537-552, 554-563, 570-580, 575-589, 591-600
AF3_1_290_150inssnpca_model_0.cif	100-221	150_151ins_mut.pdb	106-117, 111-127, 129-138
AF3_1_290_model_0.cif	100-216	150_151ins_org.pdb	106-117, 111-127, 129-138, 144-155, 149-164, 166-175, 182-195, 189-204, 206-215
AF3_1_290_r190c_model_0.cif	140-256	R190C_mut.pdb	144-155, 149-164, 166-175, 182-195, 189-204, 222-233, 227-243, 245-254
AF3_1_290_model_0.cif	140-256	R190C_org.pdb	144-155, 149-164, 166-175, 182-195, 189-204, 206-215, 222-233, 227-243, 245-254
AF3_1_640_r592c_model_0.cif	527-640	R592C_mut.pdb	532-543, 537-552, 554-563, 570-580, 575-589, 607-618, 612-627, 629-638
AF3_1_640_model_0.cif	527-640	R592C_org.pdb	532-543, 537-552, 554-563, 570-580, 575-589, 591-600, 607-618, 612-627, 629-638
AF3_1_640_r353c_model_0.cif	294-411	R353C_mut.pdb	299-312, 306-321, 323-332, 344-359, 361-370, 376-387, 381-398, 400-409
AF3_1_640_model_0.cif	294-411	R353C_org.pdb	299-312, 306-321, 323-332, 339-350, 344-359, 361-370, 376-387, 381-398, 400-409
AF3_1_1150_1095inscd_model_0.cif	1058-1146	1095_1096ins_mut.pdb	1063-1074, 1068-1083
AF3_1_1150_model_0.cif	1058-1144	1095_1096ins_org.pdb	1063-1074, 1068-1083, 1085-1094, 1101-1122, 1116-1131, 1133-1142

## Sheet: Table S5
#	cystein_residue 1	change	ref	phenotype	classification	cystein_residue 2	change	ref	phenotype	classification
1	24					37
2	31					46	C46Y	VCV002500390	not provided	Uncertain significance
3	48	C48S	VCV001715198	Adams-Oliver syndrome 5	Uncertain significance	57	C57Y	VCV002788602	Adams-Oliver syndrome 5	Uncertain significance
4	63					74
5	68					87	C87R	VCV003572831	not provided	Uncertain significance
5	68					87	C87Y	VCV003012950	Adams-Oliver syndrome 5	Uncertain significance
6	89					98
7	106					117
8	111					127
9	129					138
10	144					155	C155R	VCV003899458	not provided	Uncertain significance
11	149					164
12	166					175	C175G	VCV002709461	Adams-Oliver syndrome 5	Uncertain significance
13	182	C182Y	10.1038/s10038-024-01223-y; 10.1161/CIRCRESAHA.118.313250	Trucus arteriousus; TOF		195
14	189					204
15	206	C206Y	VCV001677660	not provided	Uncertain significance	215
15	206	C206F	This study (C08660)		Likely pathogenic	215
16	222					233
17	227					243	C243F	VCV003031490	NOTCH1-related disorder	Uncertain significance
17	227					243	C243Y	VCV003687558	Adams-Oliver syndrome 5	Uncertain significance
18	245					254	C254R	VCV002130225	Adams-Oliver syndrome 5	Uncertain significance
19	261	C261R	VCV001387392	Adams-Oliver syndrome 5	Uncertain significance	272
20	266	C266F	This study (C08918)		Uncertain significance	281
21	283	C283G	10.3389/fgene.2020.00957	TOF		292	C292Y	10.1161/CIRCRESAHA.118.313250	TOF
22	299	C299Y	VCV001700460	not provided	Uncertain significance	312
23	306	C306Y	VCV003635975	Adams-Oliver syndrome 5	Uncertain significance	321	C321R	VCV000841614	Adams-Oliver syndrome 5	Uncertain significance
24	323	C323Y	VCV002575002	not provided|Aortic valve disease 1	Uncertain significance	332	C3232Y	This study (C07803)		Likely pathogenic
24	323	C323F	This study (C08178)		Uncertain significance	332
25	339	C339W	VCV002838597	Adams-Oliver syndrome 5	Uncertain significance	350
26	344					359	C359F	VCV003365474	not provided	Uncertain significance
26	344					359	C359W	VCV001708757	not provided	Uncertain significance
27	361	C361R	VCV000933426	Adams-Oliver syndrome 5	Uncertain significance	370	C370R	VCV002571349	not provided	Likely pathogenic
27	361	C361R	VCV000933426	Adams-Oliver syndrome 5	Uncertain significance	370	C370Y	VCV000576792	Adams-Oliver syndrome 5	Uncertain significance
27	361					370	C370Y	This study (C02162)		Uncertain significance
28	376					387
29	381	C381R	VCV003342462	not provided	Uncertain significance	398	C398Y	VCV003778783	NOTCH1-related disorder	Uncertain significance
30	400					409	C409Y	VCV002631367	NOTCH1-related disorder	Uncertain significance
31	416	C416S	10.1002/ajmg.a.61364	1xAOS, 1xAOS with Pulmonary artery stenosis		429	C429R	VCV000156214; 10.1016/j.ajhg.2014.07.011	Adams-Oliver syndrome 5	Pathogenic/Likely pathogenic
32	423	C423S	VCV001305192	not provided	Uncertain significance	438
33	440					449	C449R	VCV000219376; 10.1161/CIRCGENETICS.115.001086	Adams-Oliver syndrome 5	Likely pathogenic
34	456	C456Y	VCV000219377; 10.1161/CIRCGENETICS.115.001086	Adams-Oliver syndrome 5	Likely pathogenic	467
35	461					476
36	478					487
37	494					505	C505Y	VCV000409063	Adams-Oliver syndrome 5	Uncertain significance
38	499	C499F	VCV000954372	not provided|Adams-Oliver syndrome 5	Uncertain significance	514	C514W	VCV002441688	Aortic valve disease 1	Uncertain significance
39	516					525	C525S	VCV001712762	not provided	Uncertain significance
40	532	C532S	VCV003767124	Aortic valve disease 1|Adams-Oliver syndrome 5	Uncertain significance	543
41	537	C537G	VCV002434388	not provided	Uncertain significance	552	C552Y	This study (LUV2)		Likely pathogenic
42	554	C554R	VCV003366114	not provided	Uncertain significance	563	C563R	10.1161/CIRCRESAHA.118.313250	TOF
42	554	C554Y	VCV001051533	Adams-Oliver syndrome 5	Uncertain significance	563
43	570					580	C580S	VCV001304626	not provided	Uncertain significance
43	570					580	C580Y	10.1161/CIRCRESAHA.118.313250	TOF
44	575	C575S	10.1002/pd.6290	2 cases; persistent truncus arteriosus and PA/VSD		589	C589F	This study (MT1)		Likely pathogenic
45	591					600	C600F	VCV000863121	Adams-Oliver syndrome 5	Uncertain significance
46	607	C607Y	This study (Pro3)		Likely pathogenic	618	C618S	This study (C08732)		Likely pathogenic
46	607	C607Y	10.1161/CIRCRESAHA.118.313250	TOF		618
47	612					627
48	629	C629S	This study (C07885)		Likely pathogenic	638	C638Y	This study (C08084, C08085)		Likely pathogenic
49	645	C645Y	10.1161/CIRCRESAHA.118.313250	TOF		655
50	650					664	C664Y	VCV003667097	Adams-Oliver syndrome 5	Uncertain significance
51	666					675
52	682	C62Y	10.3389/fgene.2020.00957	TOF		693
53	687					702
54	704					713
55	720					730
56	725					739
57	741					750
58	757	C757R	VCV003406934	Familial thoracic aortic aneurysm and aortic dissection	Uncertain significance	768
59	762					777	C777Y	VCV002631022	NOTCH1-related disorder	Uncertain significance
60	779	C779S	VCV002899063	Adams-Oliver syndrome 5	Uncertain significance	788	C788F	VCV000636512	not provided	Uncertain significance
61	795					806	C806Y	VCV001304124	not provided	Uncertain significance
61	795					806	C806S	VCV001463416	Adams-Oliver syndrome 5	Uncertain significance
62	800					815	C815S	VCV000452777	not provided	Uncertain significance
62	800					815	C815Y	VCV000452777	TOF
63	817					826	C826Y	This study (Pro5)		Uncertain significance
64	833	C833S	VCV000999913	Adams-Oliver syndrome 5	Likely benign	844	C844R	VCV003685123	Adams-Oliver syndrome 5	Uncertain significance
64	833	C833Y	VCV001792151	not provided|Familial thoracic aortic aneurysm and aortic dissection	Uncertain significance	844	C844R	VCV003685123	Adams-Oliver syndrome 5	Uncertain significance
65	838					855	C855Y	VCV000520093	Familial thoracic aortic aneurysm and aortic dissection|Adams-Oliver syndrome 5	Uncertain significance
66	857					866	C866S	VCV001395862	Adams-Oliver syndrome 5	Uncertain significance
67	873					884	C884W	VCV003257927	Neoplasm
68	878					893	C893G	VCV002055769	Adams-Oliver syndrome 5	Uncertain significance
68	878					893	C893R	VCV002748627	Adams-Oliver syndrome 5	Uncertain significance
69	895					904	C904R	VCV000948632	Adams-Oliver syndrome 5	Uncertain significance
70	911					922	C922R	VCV003921040	Familial thoracic aortic aneurysm and aortic dissection	Uncertain significance
71	916					931
72	933					942	C942Y	VCV003390900	Adenoid cystic carcinoma
73	949					960	C960R	VCV003921028	Familial thoracic aortic aneurysm and aortic dissection	Uncertain significance
74	954					969	C969Y	VCV003393215	Aortic valve disease 1	Uncertain significance
75	971					980
76	987					998
77	992					1007
78	1009					1018
79	1025					1036
80	1030	C1030R	VCV003300475	Familial thoracic aortic aneurysm and aortic dissection	Uncertain significance	1045
81	1047	C1047Y	VCV000850707	Adams-Oliver syndrome 5	Uncertain significance	1056
82	1063					1074	C1074Y	VCV000962688	Adams-Oliver syndrome 5	Uncertain significance
83	1068					1083
84	1085					1094	C1094Y	VCV000523596	Adams-Oliver syndrome 5	Pathogenic
85	1101	C1101R	VCV001211924	not provided	Uncertain significance	1122	C1122Y	VCV000663548	Adams-Oliver syndrome 5	Uncertain significance
86	1116					1131
87	1133	C1133G	10.1002/mgg3.1406	HTAD (heritable thoracic aortic aneurysms predisposing to acute aortic dissections)		1142	C1142R	VCV002629944	NOTCH1-related disorder	Uncertain significance
88	1149					1160
89	1154	C1154W	VCV003880504	Familial thoracic aortic aneurysm and aortic dissection	Uncertain significance	1169	C1169G	VCV003359635	not provided	Uncertain significance
90	1171					1180	C1180Y	VCV001486554	Adams-Oliver syndrome 5	Uncertain significance
91	1187					1198
92	1192					1207
93	1209					1218
94	1238					1253
95	1255					1264
96	1271	C1271Y	VCV003005552	Adams-Oliver syndrome 5	Uncertain significance	1284	C1284R	VCV003673268	Adams-Oliver syndrome 5	Uncertain significance
96	1271	C1271Y	VCV003005552	Adams-Oliver syndrome 5	Uncertain significance	1284	C1284W	VCV000636755	not provided|Adams-Oliver syndrome 5	Uncertain significance
97	1276	C1276R	VCV003880483	Familial thoracic aortic aneurysm and aortic dissection	Uncertain significance	1293
98	1295					1304
99	1311					1322	C1322R	VCV003226962	Familial thoracic aortic aneurysm and aortic dissection	Uncertain significance
100	1316	C1316Y	VCV003901506	not provided	Uncertain significance	1334	C1334Y	VCV002855159	Adams-Oliver syndrome 5	Uncertain significance
101	1336					1345
102	1352					1363
103	1357					1372
104	1374	C1374R	VCV000219379; 10.1161/CIRCGENETICS.115.001086	Adams-Oliver syndrome 5	Likely pathogenic	1383
104	1374	C1374F	VCV000424223	not provided	Likely pathogenic	1383
105	1391					1403
106	1397	C1397Y	This study (Pro7, Pro8)		Likely pathogenic	1414	C1414S	VCV000523600	Adams-Oliver syndrome 5	Uncertain significance
107	1416	C1416W	VCV002442516	not provided	Uncertain significance	1425
108	1449					1472	C1472Y	This study (Pro9)		Likely pathogenic
108	1449					1472	C1472Y	10.1038/s41431-024-01629-4	AOS
108	1449					1472	C1472W	10.1038/s41436-018-0296-x	malformation of the outflow tract (DORV;PS,VSD); digit anomalies, cutis marmorata
109	1454					1467	C1467Y	VCV003661228	Adams-Oliver syndrome 5	Uncertain significance
110	1463					1479
111	1490	C1490G	VCV000839391	Adams-Oliver syndrome 5	Uncertain significance	1514
112	1496	C1496Y	VCV000156007; 10.1016/j.ajhg.2014.07.011	Familial thoracic aortic aneurysm and aortic dissection|Adams-Oliver syndrome 5	Pathogenic/Likely pathogenic	1509
113	1505	C1505R	VCV000850097	Cholesteatoma of middle ear|Adams-Oliver syndrome 5	Uncertain significance; other	1521
114	1536	C1536W	VCV002582427	Aortic valve disease 1	Uncertain significance	1549	C1549Y	This study (C01022)		Likely pathogenic
114	1536	C1536R	10.3389/fgene.2020.00957	TOF		1549	C1549Y	10.1161/CIRCRESAHA.118.313250	TOF
115	1545					1561	C1561S	VCV003300444	Familial thoracic aortic aneurysm and aortic dissection	Uncertain significance

## Sheet: Table S6
Case	label	sample	sex	genotype	prediction scores
1	NOTCH1	C02192	M	c.5197C>T , p.(Gln1733*), c.452A>G, p.(Asn151Ser), c.3880G>A, p.(Glu1294Lys)	0.98552
2	NOTCH1	C07810	F	c.3319C>T, p.(Arg1107*)	0.98552
3	NOTCH1	C07149	M	c.436_450dup, p.(150-151insSerAsnProCysAla)	0.98547
4	NOTCH1	C08330	F	c.5950C>T, p.(Arg1984*)	0.9855
5	NOTCH1	C08345	F	c.2061C>A, p.(Cys687*)	0.9855
6	NOTCH1	C08838	F	c.5922CT>C, p.(Gln1974fs*6)	0.98549
7	NOTCH1	C08987	F	c.1143T>A, p.(Cys381*)	0.98551
8	NOTCH1	C07558	M	c.2846_2856 GTGCCAGTGAC>CCT p.(Cys949Serfs*29fs*1)	0.98548
9	NOTCH1	C07635	F	c.2176_2181 GTGGAC>TGCAACA p.(Val726fs*16)	0.98549
10	NOTCH1	C07685	F	c.5315dup, p.(Phe1773Leufs*5)	0.98551
11	NOTCH1	C01759	M	c.6211TC>T, p.(Glu2071fs*38)	0.98551
12	NOTCH1	C07964	F	c.3511-2A>G,	0.98551
13	NOTCH1	C07803	M	c.995G>A, p.(Cys332Tyr)	0.98568
14	NOTCH1	C07725	F	c.6053_6054del, p.(His2018fs*7)	0.98864
15	NOTCH1	C08660	M	c.617G>T, p.(Cys206Phe), c.619C>T, p.(Arg207Cys)	0.98549
16	NOTCH1	C07994	M	c.3507C>A, p.(Cys1169*)	0.98548
17	NOTCH1_mild	AUMC2	M	c.1774C>T, p.(Arg592Cys)	0.45762
18	NOTCH1_mild	C01673	M	c.2354-2A>G	0.88909
19	NOTCH1_mild	NOTCH1_LUV1 (FAMILY 1)	F	c.1279G>C, p.(Gly427Arg)	0.10763
20	NOTCH1_validation	NOTCH1_LUV2 (FAMILY 2)	M	c.1655G>A, p.(Cys552Tyr)	0.98549
21	NOTCH1_validation	NOTCH1_LUV4 (FAMILY 4)	F	c.5281delC, p.(Arg1761glyfs*37)	0.9855
22	NOTCH1_validation	NOTCH1_LUV5 (FAMILY 5)	M	c.2014+1G>A,	0.98551
23	NOTCH1_VUS	AUMC1	M	c.724G>A p.(Glu242Lys)	0.0157
24	NOTCH1_VUS_positive	C08510	M	c.6221A>G, p.(Tyr2074Cys)	0.89228
25	NOTCH1_VUS	AUMC3	M	c.1864G>A, p.(Asp622Asn)	0.53211
26	NOTCH1_VUS_positive	C08171	F	c.4549G>C, p.(Asp1517His)	0.98549

## Sheet: Table S7
Probe	Methylation % difference	p value	Adjusted p value	chromosome	position	UCSC Gene name(s)	UCSC gene type(s)	UCSC CpG island
cg07796335	11.2862	1.19271e-09	0.000731517	4	59167549
cg00186529	-12.8042	6.21479e-08	0.00476458	6	170452864			chr6:170451497-170452927
cg14957671	9.95103	3.20686e-08	0.00476458	12	128092394
cg11869862	-8.26974	5.43861e-08	0.00476458	15	37399798			chr15:37403042-37403267
cg00169030	14.0477	2.02581e-07	0.00933758	17	32889449
cg09050443	-8.09687	2.3093e-07	0.00933758	7	100763449
cg24998568	8.69806	3.69465e-07	0.0103	7	85379873
cg20271234	-7.6222	7.31959e-07	0.0134832	16	23288365
cg00632863	-10.3929	9.86373e-07	0.0159201	7	1702597			chr7:1703861-1710517
cg03916908	11.9072	1.1505e-06	0.0168007	14	54766171
cg09259235	-8.47924	1.58559e-06	0.0176814	10	128110754
cg06982033	-6.3091	2.2559e-06	0.0199592	8	41292791
cg22258115	-6.14036	2.40583e-06	0.0199592	7	131582208
cg15677080	-7.68279	3.04198e-06	0.0232327	7	1734117
cg11491002	-9.669	4.98268e-06	0.0285606	8	49044542			chr8:49043526-49043749
cg01080888	-10.1185	5.77919e-06	0.0302949	14	35949404
cg03027068	-7.74815	8.428e-06	0.0347861	15	37400887			chr15:37403042-37403267
cg08231697	-6.30534	1.91991e-05	0.0466532	1	157165335			chr1:157164538-157165135
cg00683285	-7.91012	2.58828e-05	0.0524585	14	28764188
cg12403132	-7.44913	2.59341e-05	0.0524585	12	17551396
cg18268041	-6.4337	3.27169e-05	0.0559068	14	105659225			chr14:105658586-105659226
cg25246421	-9.12047	3.93643e-05	0.0581345	7	54932671
cg06018514	-5.47759	4.53164e-05	0.0627236	15	41219741			chr15:41217789-41223180
cg07440507	-5.2387	4.5845e-05	0.0629031	16	51685042
cg26264232	-7.98929	5.64733e-05	0.0668654	7	27138751			chr7:27135342-27136736
cg03287432	-8.09757	7.60587e-05	0.0761563	10	135060512
cg08151596	-5.376	9.39311e-05	0.0816736	3	131246097			chr3:131245721-131246021
cg00883037	-5.35684	0.000112994	0.0860513	8	27126606
cg15227231	-7.48017	0.000125195	0.0896325	6	170467425
cg27315458	-7.29334	0.000146458	0.0946531	11	125818706
cg22203890	-7.94431	0.00014926	0.094884	5	980708
cg25322720	-13.4421	0.000151574	0.0949021	17	19628292			chr17:19627877-19628298
cg26393629	-11.0437	0.000154144	0.0954949	14	21191859			chr14:21191657-21191860
cg09868928	-6.095	0.000159464	0.0969108	19	34071693
cg15529950	-9.15136	0.000161492	0.0972274	18	76623073			chr18:76626509-76626769
cg25876879	6.75878	0.00018683	0.104264	3	64487027
cg22712739	-7.36718	0.000189649	0.104936	8	10518101
cg18847009	-6.88922	0.000201841	0.107805	2	70175826
cg20619100	-6.90612	0.000206558	0.108186	4	33105917
cg03812136	-5.09574	0.000216673	0.110282	1	18217223
cg07278425	-9.39072	0.000221459	0.111515	7	27137922			chr7:27135342-27136736
cg27451610	-5.60644	0.000222528	0.111595	12	132657410
cg04026295	-6.9171	0.000224636	0.112003	4	188789422
cg19193725	-5.68223	0.000225812	0.112176	5	92023972
cg19804051	-8.47031	0.000237399	0.11383	8	49194407
cg01660716	-5.47048	0.000253948	0.116319	14	105667315			chr14:105662777-105663403
cg20511582	-6.04309	0.000256462	0.116514	1	41799324
cg20056997	-5.53664	0.000260327	0.117228	2	10688154
cg01619929	-6.49561	0.000267364	0.118111	22	36806443			chr22:36806029-36806637
cg01817364	-6.04913	0.0002714	0.118982	5	43037411			chr5:43037259-43037520
cg19731194	-7.66774	0.000288239	0.120704	1	10887875
cg14609015	-6.52246	0.000296217	0.121192	14	96299848
cg12751521	-5.27824	0.00029527	0.121192	12	109711293
cg24428144	-8.77648	0.000317018	0.124186	12	28180450
cg15095936	-7.54042	0.000338362	0.127394	20	55534744
cg20427449	-10.1961	0.000341857	0.127426	5	180594867			chr5:180596863-180597485
cg22828581	-5.40202	0.000345909	0.128077	9	93880502			chr9:93879725-93880618
cg21250689	-10.3444	0.000352703	0.128323	2	3158027
cg21777892	-6.42761	0.00037199	0.131045	20	29848204
cg24416190	-5.61525	0.000483145	0.143783	4	186007379
cg04003871	9.23797	0.000487346	0.144466	2	241290895			chr2:241293841-241294408
cg03610228	-9.44675	0.000495597	0.144631	10	21799395			chr10:21797632-21799341
cg21855211	-5.31183	0.000510581	0.146195	2	242805838			chr2:242805752-242806034
cg09214369	-5.41891	0.000512068	0.146333	5	103144491
cg24399349	-9.41013	0.000520988	0.147042	7	55517045			chr7:55516871-55517249
cg10231801	-5.93729	0.000521241	0.147042	7	52985852
cg02443061	-6.40478	0.000527888	0.147116	11	1691234
cg04632023	-7.02903	0.000552011	0.149029	14	101586581
cg24650734	-6.08877	0.000555466	0.149122	15	71399520
cg25646708	-8.52122	0.0005737	0.150748	3	134031685			chr3:134031662-134032591
cg17870997	11.6026	0.000643114	0.156568	2	121498521			chr2:121499228-121499578
cg25870396	-7.23607	0.000678894	0.158719	11	61880123
cg13349472	-6.52075	0.000678686	0.158719	2	25427451			chr2:25427101-25427577
cg13927504	6.69515	0.000793474	0.16782	5	39800321
cg09362839	-8.16583	0.000810326	0.16876	12	4967708
cg22177688	-5.63428	0.000845804	0.170267	10	128359157
cg13710556	-5.85932	0.000964154	0.177942	7	25893925			chr7:25891956-25892615
cg19865237	-8.31623	0.00125275	0.19151	14	104690244			chr14:104690039-104690274
cg05382314	-6.40132	0.00147732	0.20101	14	90910899
cg12571629	-7.42793	0.00167387	0.208089	2	445430
cg12756504	-6.99171	0.00180096	0.212703	15	37396672			chr15:37392601-37392829
cg08343624	-8.17575	0.00201986	0.220341	17	79364211			chr17:79366806-79374742
cg22776392	-8.57983	0.00283864	0.243236	1	180923569			chr1:180922915-180923692
cg01430344	-7.79252	0.00378113	0.264309	2	16154047			chr2:16153944-16154419
cg06880594	8.1961	6.70703e-06	0.0323475	16	48161012	ABCC12	Body
cg05672344	-5.62574	1.83139e-06	0.0191184	19	6313614	ACER1	Body
cg02227453	-5.38566	3.65626e-05	0.0571515	22	50919482	ADM2	TSS1500	chr22:50919453-50920376
cg07490070	-9.2289	0.000334736	0.126693	2	97505464	ANKRD23	Body	chr2:97505219-97505600
cg16867568	-6.49627	0.000153173	0.0950855	19	42471655	ATP1A3;ATP1A3;ATP1A3	Body;Body;Body
cg17963799	-6.49521	0.000514336	0.146518	13	26551884	ATP8A2	Body
cg12708340	-5.25553	8.43931e-05	0.0778347	16	1384971	BAIAP3;BAIAP3;BAIAP3;BAIAP3;BAIAP3;BAIAP3	5'UTR;5'UTR;5'UTR;5'UTR;TSS1500;Body	chr16:1382916-1384735
cg06906435	-10.3575	4.5396e-05	0.0627236	14	99177777	C14orf177	TSS200
cg02320084	-5.55975	0.000211811	0.109555	16	85769350	C16orf74	5'UTR
cg10579718	-6.52221	1.9397e-05	0.0466532	1	1052886	C1orf159	TSS1500	chr1:1051178-1052445
cg22496723	-11.3875	1.06288e-05	0.0370839	22	36960779	CACNG2	Body	chr22:36960369-36961054
cg25439374	-5.95144	0.000354822	0.128666	1	174968015	CACYBP;CACYBP	TSS1500;TSS1500	chr1:174968490-174969624
cg26610739	7.28073	0.00287323	0.243871	16	83171068	CDH13	Body
cg11882888	-5.5271	0.000619809	0.155154	20	60364704	CDH4;CDH4;CDH4	Body;Body;Body
cg17036908	-6.79897	5.90887e-06	0.0307122	20	60174898	CDH4;CDH4;CDH4;CDH4	1stExon;Body;Body;5'UTR
cg25509184	7.03994	0.000172158	0.100656	7	117119382	CFTR	TSS1500
cg18026197	-9.0197	0.00268409	0.240033	3	126422536	CHCHD6	TSS1500	chr3:126422888-126423609
cg17658717	-7.14719	0.000133827	0.0917004	3	45077254	CLEC3B	Body	chr3:45077069-45077690
cg27224143	7.67997	0.000431267	0.137498	8	88056657	CNBD1	Body
cg06835526	-7.2742	0.00143479	0.199517	20	61925431	COL20A1	5'UTR	chr20:61927194-61927482
cg08959039	-13.3868	4.71118e-06	0.0283281	13	111062266	COL4A2	Body
cg20709110	-9.59855	0.000653885	0.15716	22	19946873	COMT;COMT;COMT	5'UTR;5'UTR;5'UTR
cg26333393	-7.67005	0.000147789	0.094884	10	125651726	CPXM2	TSS1500	chr10:125650820-125651373
cg06181187	-6.15432	0.00037843	0.131863	2	209010896	CRYGB	TSS200
cg10579530	-7.31904	3.17922e-05	0.0559068	2	80550119	CTNNA2;CTNNA2	Body;Body	chr2:80549578-80549798
cg25184712	-6.99139	0.000466395	0.141445	1	58374085	DAB1	5'UTR
cg23634348	-7.05652	0.000281036	0.119783	4	967822	DGKQ	TSS1500	chr4:966732-968137
cg13775636	8.77675	7.4134e-06	0.0339612	10	711897	DIP2C	Body	chr10:711896-712395
cg10464467	6.05648	6.81068e-05	0.0731742	21	39448463	DSCR4	Body
cg20473374	-6.20045	0.000502916	0.145505	2	25354401	EFR3B	Body	chr2:25354283-25354777
cg02929993	10.2533	1.59908e-05	0.0443778	7	55195359	EGFR;EGFR;EGFR;EGFR	Body;Body;Body;Body
cg21321148	-5.54618	7.70324e-05	0.0761563	5	111669022	EPB41L4A	Body
cg06744951	6.56805	2.94257e-06	0.0232327	16	14029472	ERCC4	Body
cg08234354	-8.53903	0.00380493	0.264812	8	72269398	EYA1;EYA1;EYA1;EYA1	TSS1500;5'UTR;TSS1500;TSS1500
cg08241360	-17.1245	5.2382e-06	0.0292063	9	129244738	FAM125B	Body	chr9:129244737-129245247
cg14359659	-5.99732	2.40198e-05	0.0514003	2	239072043	FAM132B	Body	chr2:239072191-239073109
cg01612766	-8.08785	0.00056971	0.150415	10	128995478	FAM196A;DOCK1;DOCK1	TSS1500;Body;Body	chr10:128993505-128995167
cg01572460	-6.10824	1.37991e-06	0.0176814	5	15865364	FBXL7	Body
cg12050271	-5.6652	0.0007618	0.165978	1	2980399	FLJ42875	Body	chr1:2979275-2980758
cg02901365	-6.07843	3.27751e-05	0.0559068	7	44228750	GCK;GCK	1stExon;5'UTR
cg25281042	-5.61142	0.000215814	0.110282	10	35897304	GJD4	Body	chr10:35896518-35897461
cg06245658	5.00242	3.47079e-05	0.0566097	2	121637812	GLI2	Body
cg11246948	-8.93633	0.000202107	0.107805	11	120581281	GRIK4;GRIK4;GRIK4	Body;Body;Body
cg17431280	-9.70095	8.99484e-05	0.0799983	19	47507461	GRLF1	3'UTR	chr19:47507306-47507692
cg20129782	-6.94817	0.00227209	0.228345	20	30135362	HM13;HM13;HM13;PSIMCT-1	Body;Body;Body;Body	chr20:30135076-30135292
cg25122233	8.33462	0.000131347	0.0911575	12	54412506	HOXC4;HOXC5;HOXC6	5'UTR;Body;5'UTR	chr12:54412990-54413346
cg24366429	-6.14472	0.000723138	0.16318	17	77207424	HRNBP3	5'UTR
cg20464360	-7.777	1.19615e-06	0.017061	17	56564855	HSF5	Body	chr17:56564854-56565891
cg18282375	8.44476	0.00112428	0.18537	20	3732920	HSPA12B	3'UTR	chr20:3732061-3732944
cg17148395	-9.40203	7.79808e-06	0.0344081	15	65654217	IGDCC3	Body	chr15:65654077-65654334
cg17686487	-7.19625	1.9327e-05	0.0466532	5	50686281	ISL1	Body	chr5:50685453-50686148
cg26293019	-8.67081	0.000221291	0.111515	5	50688913	ISL1	Body	chr5:50685453-50686148
cg10361095	-9.24024	3.90792e-05	0.0580341	3	42727425	KBTBD5	1stExon	chr3:42727084-42727916
cg00495320	-7.11967	0.000305342	0.122002	8	73454968	KCNB2	5'UTR
cg05927579	-9.77431	0.00472733	0.283236	20	43378669	KCNK15	Body	chr20:43378668-43379438
cg18310895	-7.3689	0.000620671	0.155249	20	62086195	KCNQ2;KCNQ2;KCNQ2;KCNQ2;KCNQ2	Body;Body;Body;Body;Body	chr20:62084467-62084903
cg12720574	-7.97697	0.000152582	0.0950855	18	24230896	KCTD1	Body
cg16284589	-5.16695	3.2922e-06	0.0233543	12	121951814	KDM2B;KDM2B	Body;Body
cg01215773	-7.15469	0.000245221	0.114998	10	24809288	KIAA1217;KIAA1217;KIAA1217;KIAA1217;KIAA1217;KIAA1217	Body;Body;Body;Body;Body;Body
cg03066050	-6.88406	0.000261803	0.117394	9	110249749	KLF4	Body	chr9:110249748-110252660
cg01707820	-5.94269	2.40525e-05	0.0514003	2	23819033	KLHL29	Body
cg01258050	-6.79113	0.000329364	0.126253	10	135010532	KNDC1	Body
cg07277296	10.1235	2.34497e-07	0.00933758	12	117932869	KSR2	Body
cg12140530	7.55783	3.3509e-06	0.0233543	13	36271801	LINC00445;LINC00445;MIR548F5	Body;TSS200;Body
cg22402154	-5.78733	7.11543e-06	0.0335541	10	128110769	LINC00601	TSS1500
cg15935723	-9.285	0.000109636	0.0855836	20	19241576	LOC100130264;SLC24A3	Body;Body
cg20007021	-14.5158	0.000811228	0.16876	14	24780404	LTB4R2;LTB4R2;LTB4R2;LTB4R;CIDEB;CIDEB	Body;1stExon;Body;TSS1500;1stExon;5'UTR	chr14:24779874-24780932
cg17618327	-8.09097	7.81717e-05	0.0761563	7	2143942	MAD1L1;MAD1L1;MAD1L1	Body;Body;Body
cg13629798	6.82968	0.000690807	0.159481	3	50685355	MAPKAPK3;MAPKAPK3;MAPKAPK3	Body;Body;Body
cg13108304	-11.3089	0.00483114	0.284653	13	113634805	MCF2L;MCF2L	Body;Body	chr13:113635654-113635899
cg12635499	-5.14843	0.000250517	0.115699	15	66437763	MEGF11	5'UTR
cg01148731	-10.5509	9.55685e-06	0.0355237	5	174156296	MSX2	Body	chr5:174158680-174159729
cg23811792	-5.65187	0.00020419	0.107805	18	47429381	MYO5B	Body
cg06548416	-6.33274	8.66888e-06	0.0347861	1	24438703	MYOM3	TSS200
cg25673584	-10.4677	0.000101719	0.083757	19	46417551	NANOS2	1stExon	chr19:46417528-46417745
cg24902478	-8.05289	1.203e-05	0.0381598	12	78241621	NAV3	Body
cg07162820	-5.34643	0.000155551	0.0959789	14	24837146	NFATC4;NFATC4	Body;TSS200	chr14:24837872-24838324
cg03839794	-6.87953	0.00248022	0.234297	14	34269541	NPAS3;NPAS3;NPAS3;NPAS3	Body;Body;Body;Body	chr14:34268946-34270438
cg00545773	-10.4227	2.95031e-08	0.00476458	15	96776154	NR2F2-AS1	Body
cg02457750	-5.13607	2.85757e-05	0.0545299	1	200011273	NR5A2;NR5A2	Body;Body	chr1:200011400-200012055
cg04025964	-6.45041	0.000608524	0.154143	1	200010788	NR5A2;NR5A2	Body;Body	chr1:200010625-200010832
cg24235518	-6.51833	0.000516166	0.146631	20	61371425	NTSR1	Body
cg15380508	-9.54209	0.000160196	0.0970327	5	166874870	ODZ2	Body
cg00898123	-5.36394	0.000103427	0.0841315	10	50946810	OGDHL;OGDHL;OGDHL	Body;Body;Body
cg02152233	-8.92031	5.56596e-05	0.0668654	1	29189789	OPRD1	Body	chr1:29189307-29189952
cg03404471	-6.50386	0.000257595	0.116519	5	41869373	OXCT1-AS1;OXCT1	TSS1500;Body	chr5:41869663-41870876
cg18804667	-11.2917	3.52201e-06	0.0237376	5	58883392	PDE4D;PDE4D;PDE4D	Body;TSS1500;Body
cg14904295	-5.8675	0.000462855	0.141091	19	57348529	PEG3;PEG3;ZIM2;ZIM2;ZIM2;PEG3;PEG3	5'UTR;5'UTR;5'UTR;5'UTR;5'UTR;5'UTR;5'UTR	chr19:57349997-57350470
cg16050561	-6.6828	0.0013543	0.196272	22	50738160	PLXNB2	5'UTR	chr22:50737809-50738961
cg27247736	-9.68055	0.00293488	0.245093	6	160241105	PNLDC1	Body
cg18942934	-8.19498	0.000152234	0.0949828	6	32847762	PPP1R2P1	Body	chr6:32847498-32847846
cg02556634	-6.29563	7.67099e-05	0.0761563	4	6449000	PPP2R2C	Body
cg21475097	-5.58138	0.000142574	0.0936176	1	3164642	PRDM16;PRDM16	Body;Body	chr1:3163969-3164643
cg24807850	-6.69833	0.000885358	0.172905	1	3165391	PRDM16;PRDM16	Body;Body	chr1:3163969-3164643
cg01260299	-8.66284	2.26729e-05	0.0497407	14	94232544	PRIMA1	Body
cg01788113	-8.07429	0.00301283	0.246924	3	46759472	PRSS50	TSS200	chr3:46759064-46759550
cg07839105	-6.88867	7.70984e-06	0.0342653	19	694837	PRSSL1	Body	chr19:690638-690927
cg24923931	-7.94084	0.000533787	0.147802	19	40904691	PRX;PRX	Body;Body	chr19:40904444-40904955
cg12974379	-6.78794	0.00162787	0.206492	3	110788738	PVRL3-AS1	Body	chr3:110790149-110791401
cg20516032	6.67985	1.21349e-05	0.0381598	8	128994030	PVT1	Body
cg19933487	-6.67824	0.00208894	0.222715	16	29703339	QPRT	Body	chr16:29706198-29706458
cg06775073	-6.29044	0.000403097	0.13429	17	17603749	RAI1	5'UTR	chr17:17603583-17604147
cg08170023	-6.3466	0.000823377	0.169247	10	43699342	RASGEF1A;RASGEF1A	Body;Body	chr10:43697777-43698177
cg07113006	-8.94914	8.21957e-06	0.0347861	1	45097282	RNF220	Body	chr1:45097281-45098049
cg02939577	-5.38584	0.000204352	0.107805	1	45098576	RNF220	Body	chr1:45097281-45098049
cg26371324	-6.38353	7.35688e-05	0.074828	14	24617532	RNF31;RNF31	5'UTR;Body	chr14:24616322-24617115
cg08770870	-8.02216	0.000932555	0.175716	17	154410	RPH3AL	Body	chr17:152117-152438
cg07917609	-6.0602	0.000840816	0.170195	5	33938225	RXFP3	1stExon	chr5:33936168-33938309
cg04554576	-9.35336	0.000106043	0.0850472	2	200168577	SATB2	Body
cg01735398	-5.54815	2.04356e-05	0.0471187	17	18907305	SLC5A10;FAM83G;SLC5A10	Body;Body;Body	chr17:18906909-18908243
cg11325573	-5.7194	0.000393227	0.133393	5	1201454	SLC6A19	TSS1500	chr5:1201443-1202138
cg14765933	-8.29338	0.00297465	0.246122	5	1414924	SLC6A3	Body	chr5:1416792-1417004
cg14137381	-11.9366	0.00463573	0.281692	5	502291	SLC9A3	Body	chr5:500388-500612
cg23339720	-7.34644	0.00115152	0.186246	3	140814055	SPSB4	Body	chr3:140813913-140814134
cg27129048	-6.65725	0.000145308	0.0944071	15	92938576	ST8SIA2	Body	chr15:92936677-92938521
cg20667480	-7.24221	0.00207801	0.222263	17	77916768	TBC1D16	Body	chr17:77916684-77916916
cg03265111	-5.2476	8.5326e-05	0.0781078	15	30212876	TJP1	Body
cg23747731	-8.69137	7.94603e-05	0.0768686	1	175389315	TNR	5'UTR
cg13400512	-7.39699	0.000713106	0.1622	6	32064578	TNXB	Body	chr6:32063533-32065044
cg00525277	-8.76332	0.00397307	0.268355	6	32064239	TNXB	Body	chr6:32063533-32065044
cg00812236	7.66169	0.00357591	0.259333	16	2210434	TRAF7	5'UTR	chr16:2214222-2215518
cg00853940	-6.73068	0.00103443	0.181051	2	234847683	TRPM8	Body	chr2:234847647-234847857
cg05548190	-6.85732	0.000466893	0.14146	5	176432570	UIMC1	5'UTR	chr5:176432854-176433908
cg00454305	-6.04064	0.000987509	0.178969	16	1429905	UNKL	TSS1500	chr16:1429050-1430104
cg05620261	-9.7677	0.000541255	0.148626	19	34991070	WTIP	Body	chr19:34988748-34988951
cg00896370	-5.05257	4.61228e-05	0.0630024	3	147116807	ZIC4;ZIC4;ZIC4	Body;Body;Body	chr3:147115764-147116421

## Sheet: Table S8
term ID	term description	observed gene count	background gene count	strength	false discovery rate	matching proteins in your network (IDs)	matching proteins in your network (labels)
GO:0003266	Regulation of secondary heart field cardioblast proliferation	3	10	1.69	0.0464	9606.ENSP00000230658,9606.ENSP00000496255,9606.ENSP00000498587	ISL1,EYA1,NOTCH1
GO:0007409	Axonogenesis	11	363	0.7	0.0228	9606.ENSP00000230658,9606.ENSP00000352288,9606.ENSP00000356646,9606.ENSP00000360280,9606.ENSP00000371070,9606.ENSP00000384638,9606.ENSP00000390436,9606.ENSP00000427874,9606.ENSP00000484928,9606.ENSP00000498587,9606.ENSP00000500409	ISL1,PLXNB2,TNR,DAB1,ATP8A2,CTNNA2,GLI2,TENM2,CDH4,NOTCH1,ARHGAP35
GO:0048812	Neuron projection morphogenesis	13	477	0.65	0.0217	9606.ENSP00000230658,9606.ENSP00000268164,9606.ENSP00000352288,9606.ENSP00000356646,9606.ENSP00000360280,9606.ENSP00000371070,9606.ENSP00000384638,9606.ENSP00000388910,9606.ENSP00000390436,9606.ENSP00000427874,9606.ENSP00000484928,9606.ENSP00000498587,9606.ENSP00000500409	ISL1,ST8SIA2,PLXNB2,TNR,DAB1,ATP8A2,CTNNA2,NFATC4,GLI2,TENM2,CDH4,NOTCH1,ARHGAP35
GO:0048667	Cell morphogenesis involved in neuron differentiation	12	438	0.65	0.0228	9606.ENSP00000230658,9606.ENSP00000352288,9606.ENSP00000356646,9606.ENSP00000360280,9606.ENSP00000371070,9606.ENSP00000384638,9606.ENSP00000388910,9606.ENSP00000390436,9606.ENSP00000427874,9606.ENSP00000484928,9606.ENSP00000498587,9606.ENSP00000500409	ISL1,PLXNB2,TNR,DAB1,ATP8A2,CTNNA2,NFATC4,GLI2,TENM2,CDH4,NOTCH1,ARHGAP35
GO:0009792	Embryo development ending in birth or egg hatching	18	676	0.64	0.0030	9606.ENSP00000230658,9606.ENSP00000243108,9606.ENSP00000275493,9606.ENSP00000309336,9606.ENSP00000347548,9606.ENSP00000348416,9606.ENSP00000352288,9606.ENSP00000356331,9606.ENSP00000365637,9606.ENSP00000366271,9606.ENSP00000376007,9606.ENSP00000381237,9606.ENSP00000390436,9606.ENSP00000399808,9606.ENSP00000401112,9606.ENSP00000496255,9606.ENSP00000498587,9606.ENSP00000500409	ISL1,HOXC6,EGFR,HOXC5,RNF220,TJP1,PLXNB2,NR5A2,KIAA1217,KDM2B,PNLDC1,HM13,GLI2,HOXC4,SATB2,EYA1,NOTCH1,ARHGAP35
GO:0043009	Chordate embryonic development	17	654	0.63	0.0033	9606.ENSP00000230658,9606.ENSP00000243108,9606.ENSP00000275493,9606.ENSP00000309336,9606.ENSP00000347548,9606.ENSP00000348416,9606.ENSP00000352288,9606.ENSP00000365637,9606.ENSP00000366271,9606.ENSP00000376007,9606.ENSP00000381237,9606.ENSP00000390436,9606.ENSP00000399808,9606.ENSP00000401112,9606.ENSP00000496255,9606.ENSP00000498587,9606.ENSP00000500409	ISL1,HOXC6,EGFR,HOXC5,RNF220,TJP1,PLXNB2,KIAA1217,KDM2B,PNLDC1,HM13,GLI2,HOXC4,SATB2,EYA1,NOTCH1,ARHGAP35
GO:0000904	Cell morphogenesis involved in differentiation	13	554	0.59	0.0349	9606.ENSP00000230658,9606.ENSP00000260988,9606.ENSP00000352288,9606.ENSP00000356646,9606.ENSP00000360280,9606.ENSP00000371070,9606.ENSP00000384638,9606.ENSP00000388910,9606.ENSP00000390436,9606.ENSP00000427874,9606.ENSP00000484928,9606.ENSP00000498587,9606.ENSP00000500409	ISL1,CRYGB,PLXNB2,TNR,DAB1,ATP8A2,CTNNA2,NFATC4,GLI2,TENM2,CDH4,NOTCH1,ARHGAP35
GO:0009790	Embryo development	22	1049	0.54	0.0033	9606.ENSP00000230658,9606.ENSP00000239243,9606.ENSP00000243108,9606.ENSP00000275493,9606.ENSP00000309336,9606.ENSP00000347548,9606.ENSP00000348416,9606.ENSP00000352288,9606.ENSP00000353654,9606.ENSP00000356331,9606.ENSP00000363804,9606.ENSP00000365637,9606.ENSP00000366271,9606.ENSP00000371070,9606.ENSP00000376007,9606.ENSP00000381237,9606.ENSP00000390436,9606.ENSP00000399808,9606.ENSP00000401112,…	ISL1,MSX2,HOXC6,EGFR,HOXC5,RNF220,TJP1,PLXNB2,COL4A2,NR5A2,KLF4,KIAA1217,KDM2B,ATP8A2,PNLDC1,HM13,GLI2,HOXC4,SATB2,EYA1,NOTCH1,ARHGAP35
GO:0048646	Anatomical structure formation involved in morphogenesis	20	938	0.54	0.0047	9606.ENSP00000003084,9606.ENSP00000230658,9606.ENSP00000239243,9606.ENSP00000268613,9606.ENSP00000304437,9606.ENSP00000348416,9606.ENSP00000352288,9606.ENSP00000353654,9606.ENSP00000363804,9606.ENSP00000366271,9606.ENSP00000371070,9606.ENSP00000376007,9606.ENSP00000379087,9606.ENSP00000386908,9606.ENSP00000388910,9606.ENSP00000390436,9606.ENSP00000485033,9606.ENSP00000496255,9606.ENSP00000498587,…	CFTR,ISL1,MSX2,CDH13,KNDC1,TJP1,PLXNB2,COL4A2,KLF4,KDM2B,ATP8A2,PNLDC1,ADM2,MEGF11,NFATC4,GLI2,DOCK1,EYA1,NOTCH1,ARHGAP35
GO:0000902	Cell morphogenesis	15	708	0.54	0.0291	9606.ENSP00000230658,9606.ENSP00000260988,9606.ENSP00000268164,9606.ENSP00000275493,9606.ENSP00000352288,9606.ENSP00000356646,9606.ENSP00000360280,9606.ENSP00000371070,9606.ENSP00000384638,9606.ENSP00000388910,9606.ENSP00000390436,9606.ENSP00000427874,9606.ENSP00000484928,9606.ENSP00000498587,9606.ENSP00000500409	ISL1,CRYGB,ST8SIA2,EGFR,PLXNB2,TNR,DAB1,ATP8A2,CTNNA2,NFATC4,GLI2,TENM2,CDH4,NOTCH1,ARHGAP35
GO:0009653	Anatomical structure morphogenesis	32	2229	0.37	0.0095	9606.ENSP00000003084,9606.ENSP00000230658,9606.ENSP00000239243,9606.ENSP00000260988,9606.ENSP00000268164,9606.ENSP00000268613,9606.ENSP00000270349,9606.ENSP00000275493,9606.ENSP00000304437,9606.ENSP00000348416,9606.ENSP00000352288,9606.ENSP00000353654,9606.ENSP00000356331,9606.ENSP00000356646,9606.ENSP00000360280,9606.ENSP00000363804,9606.ENSP00000366271,9606.ENSP00000371070,9606.ENSP00000376007,…	CFTR,ISL1,MSX2,CRYGB,ST8SIA2,CDH13,SLC6A3,EGFR,KNDC1,TJP1,PLXNB2,COL4A2,NR5A2,TNR,DAB1,KLF4,KDM2B,ATP8A2,PNLDC1,ADM2,CTNNA2,MEGF11,NFATC4,GLI2,HOXC4,SATB2,TENM2,CDH4,DOCK1,EYA1,NOTCH1,ARHGAP35
GO:0007275	Multicellular organism development	46	4209	0.25	0.0228	9606.ENSP00000196371,9606.ENSP00000230658,9606.ENSP00000239243,9606.ENSP00000243108,9606.ENSP00000260988,9606.ENSP00000268164,9606.ENSP00000268613,9606.ENSP00000270349,9606.ENSP00000275493,9606.ENSP00000304437,9606.ENSP00000309336,9606.ENSP00000323074,9606.ENSP00000326018,9606.ENSP00000347548,9606.ENSP00000348416,9606.ENSP00000352035,9606.ENSP00000352288,9606.ENSP00000353654,9606.ENSP00000356331,…	OXCT1,ISL1,MSX2,HOXC6,CRYGB,ST8SIA2,CDH13,SLC6A3,EGFR,KNDC1,HOXC5,RAI1,PRX,RNF220,TJP1,KCNQ2,PLXNB2,COL4A2,NR5A2,TNR,CACYBP,DAB1,KLF4,KIAA1217,KDM2B,ATP8A2,PNLDC1,ADM2,NAV3,HM13,CTNNA2,MAD1L1,MEGF11,NFATC4,GLI2,HOXC4,SATB2,TENM2,ZIC4,ATP1A3,RBFOX3,CDH4,DOCK1,EYA1,NOTCH1,ARHGAP35
GO:0048731	System development	42	3867	0.25	0.0466	9606.ENSP00000196371,9606.ENSP00000230658,9606.ENSP00000239243,9606.ENSP00000243108,9606.ENSP00000260988,9606.ENSP00000268164,9606.ENSP00000268613,9606.ENSP00000270349,9606.ENSP00000275493,9606.ENSP00000304437,9606.ENSP00000309336,9606.ENSP00000323074,9606.ENSP00000326018,9606.ENSP00000347548,9606.ENSP00000352035,9606.ENSP00000352288,9606.ENSP00000353654,9606.ENSP00000356646,9606.ENSP00000356652,…	OXCT1,ISL1,MSX2,HOXC6,CRYGB,ST8SIA2,CDH13,SLC6A3,EGFR,KNDC1,HOXC5,RAI1,PRX,RNF220,KCNQ2,PLXNB2,COL4A2,TNR,CACYBP,DAB1,KLF4,KIAA1217,KDM2B,ATP8A2,ADM2,NAV3,CTNNA2,MAD1L1,MEGF11,NFATC4,GLI2,HOXC4,SATB2,TENM2,ZIC4,ATP1A3,RBFOX3,CDH4,DOCK1,EYA1,NOTCH1,ARHGAP35
GO:0048856	Anatomical structure development	53	5117	0.23	0.0217	9606.ENSP00000003084,9606.ENSP00000196371,9606.ENSP00000230658,9606.ENSP00000239243,9606.ENSP00000243108,9606.ENSP00000260988,9606.ENSP00000268164,9606.ENSP00000268613,9606.ENSP00000270349,9606.ENSP00000275493,9606.ENSP00000287777,9606.ENSP00000296130,9606.ENSP00000301452,9606.ENSP00000304437,9606.ENSP00000309336,9606.ENSP00000323074,9606.ENSP00000326018,9606.ENSP00000333519,9606.ENSP00000341021,…	CFTR,OXCT1,ISL1,MSX2,HOXC6,CRYGB,ST8SIA2,CDH13,SLC6A3,EGFR,KLHL40,CLEC3B,ACER1,KNDC1,HOXC5,RAI1,PRX,SLC24A3,NANOS2,PDE4D,RNF220,TJP1,KCNQ2,PLXNB2,COL4A2,NR5A2,TNR,CACYBP,DAB1,KLF4,KIAA1217,KDM2B,ATP8A2,PNLDC1,ADM2,NAV3,HM13,CTNNA2,MAD1L1,MEGF11,NFATC4,GLI2,HOXC4,SATB2,TENM2,ZIC4,ATP1A3,RBFOX3,CDH4,DOCK1,EYA1,NOTCH1,ARHGAP35
GO:0032502	Developmental process	56	5657	0.21	0.0244	9606.ENSP00000003084,9606.ENSP00000196371,9606.ENSP00000230658,9606.ENSP00000239243,9606.ENSP00000243108,9606.ENSP00000260988,9606.ENSP00000268164,9606.ENSP00000268613,9606.ENSP00000270349,9606.ENSP00000270722,9606.ENSP00000275493,9606.ENSP00000287777,9606.ENSP00000296130,9606.ENSP00000301452,9606.ENSP00000304437,9606.ENSP00000309336,9606.ENSP00000323074,9606.ENSP00000324510,9606.ENSP00000326018,…	CFTR,OXCT1,ISL1,MSX2,HOXC6,CRYGB,ST8SIA2,CDH13,SLC6A3,PRDM16,EGFR,KLHL40,CLEC3B,ACER1,KNDC1,HOXC5,RAI1,BAIAP3,PRX,SLC24A3,NANOS2,PDE4D,RNF220,TJP1,KCNQ2,PLXNB2,COL4A2,COMT,NR5A2,TNR,CACYBP,DAB1,KLF4,KIAA1217,KDM2B,ATP8A2,PNLDC1,ADM2,NAV3,HM13,CTNNA2,MAD1L1,MEGF11,NFATC4,GLI2,HOXC4,SATB2,TENM2,ZIC4,ATP1A3,RBFOX3,CDH4,DOCK1,EYA1,NOTCH1,ARHGAP35
GO:0032501	Multicellular organismal process	63	6490	0.2	0.0217	9606.ENSP00000003084,9606.ENSP00000196371,9606.ENSP00000230658,9606.ENSP00000234961,9606.ENSP00000239243,9606.ENSP00000243108,9606.ENSP00000260988,9606.ENSP00000268164,9606.ENSP00000268613,9606.ENSP00000270349,9606.ENSP00000273814,9606.ENSP00000275493,9606.ENSP00000285039,9606.ENSP00000296130,9606.ENSP00000300105,9606.ENSP00000301452,9606.ENSP00000304437,9606.ENSP00000309336,9606.ENSP00000323074,…	CFTR,OXCT1,ISL1,OPRD1,MSX2,HOXC6,CRYGB,ST8SIA2,CDH13,SLC6A3,DGKQ,EGFR,MYO5B,CLEC3B,CACNG2,ACER1,KNDC1,HOXC5,RAI1,TRPM8,PRX,IGDCC3,SLC24A3,NANOS2,PDE4D,RNF220,TJP1,KCNQ2,PLXNB2,COL4A2,NR5A2,TNR,CACYBP,NTSR1,DAB1,MYOM3,KLF4,KIAA1217,KDM2B,ATP8A2,PNLDC1,ADM2,NAV3,HM13,CTNNA2,MAD1L1,MEGF11,NFATC4,GLI2,HOXC4,SATB2,TENM2,INSYN2A,ZIC4,GRIK4,ATP1A3,LTB4R2,RBFOX3,CDH4,DOCK1,EYA1,NOTCH1,ARHGAP35
GO:0048518	Positive regulation of biological process	60	6207	0.2	0.0228	9606.ENSP00000003084,9606.ENSP00000196371,9606.ENSP00000230658,9606.ENSP00000234961,9606.ENSP00000239243,9606.ENSP00000268164,9606.ENSP00000268613,9606.ENSP00000270349,9606.ENSP00000270722,9606.ENSP00000273814,9606.ENSP00000275493,9606.ENSP00000287777,9606.ENSP00000296130,9606.ENSP00000300105,9606.ENSP00000304437,9606.ENSP00000311609,9606.ENSP00000315112,9606.ENSP00000318944,9606.ENSP00000323074,…	CFTR,OXCT1,ISL1,OPRD1,MSX2,ST8SIA2,CDH13,SLC6A3,PRDM16,DGKQ,EGFR,KLHL40,CLEC3B,CACNG2,KNDC1,SPSB4,RNF31,TRAF7,RAI1,TRPM8,BAIAP3,PEG3,RXFP3,RPH3AL,SLC24A3,CIDEB,NANOS2,PDE4D,RNF220,TJP1,NPAS3,PLXNB2,NR5A2,TNR,NTSR1,DAB1,RASGEF1A,KLF4,KDM2B,ATP8A2,PNLDC1,ADM2,NAV3,MAD1L1,NFATC4,KSR2,GLI2,HOXC4,SATB2,TNXB,UIMC1,TENM2,MCF2L,ERFE,WTIP,CDH4,DOCK1,EYA1,NOTCH1,ARHGAP35
EFO:0008336	Disease progression measurement	6	120	0.91	0.0498	9606.ENSP00000356646,9606.ENSP00000384638,9606.ENSP00000420659,9606.ENSP00000427874,9606.ENSP00000463653,9606.ENSP00000485033	TNR,CTNNA2,KLHL29,TENM2,RBFOX3,DOCK1
EFO:0005271	Sleep duration	11	254	0.85	0.0016	9606.ENSP00000264717,9606.ENSP00000268613,9606.ENSP00000270349,9606.ENSP00000285039,9606.ENSP00000360280,9606.ENSP00000376848,9606.ENSP00000385334,9606.ENSP00000389715,9606.ENSP00000427874,9606.ENSP00000430073,9606.ENSP00000484928	GCKR,CDH13,SLC6A3,MYO5B,DAB1,PRIMA1,MAD1L1,KSR2,TENM2,CNBD1,CDH4
EFO:0008579	Risk-taking behaviour	8	223	0.77	0.0388	9606.ENSP00000268613,9606.ENSP00000354772,9606.ENSP00000360280,9606.ENSP00000385334,9606.ENSP00000407685,9606.ENSP00000420659,9606.ENSP00000427874,9606.ENSP00000435509	CDH13,MVB12B,DAB1,MAD1L1,TNXB,KLHL29,TENM2,ZIC4
EFO:0004318	Smoking behavior	8	229	0.76	0.0445	9606.ENSP00000241305,9606.ENSP00000243108,9606.ENSP00000309336,9606.ENSP00000333519,9606.ENSP00000381007,9606.ENSP00000385334,9606.ENSP00000399808,9606.ENSP00000427874	CPXM2,HOXC6,HOXC5,SLC24A3,NAV3,MAD1L1,HOXC4,TENM2
EFO:0004873	Cytokine measurement	15	449	0.74	0.00056	9606.ENSP00000264717,9606.ENSP00000280886,9606.ENSP00000301712,9606.ENSP00000345502,9606.ENSP00000347548,9606.ENSP00000360280,9606.ENSP00000363583,9606.ENSP00000371070,9606.ENSP00000381007,9606.ENSP00000384638,9606.ENSP00000386908,9606.ENSP00000389715,9606.ENSP00000427874,9606.ENSP00000484928,9606.ENSP00000496255	GCKR,DIP2C,UNKL,PDE4D,RNF220,DAB1,RASGEF1A,ATP8A2,NAV3,CTNNA2,MEGF11,KSR2,TENM2,CDH4,EYA1
EFO:0004949	Clinical temporal measurement	9	276	0.73	0.0340	9606.ENSP00000304437,9606.ENSP00000353654,9606.ENSP00000354511,9606.ENSP00000356646,9606.ENSP00000384638,9606.ENSP00000420659,9606.ENSP00000427874,9606.ENSP00000463653,9606.ENSP00000485033	KNDC1,COL4A2,COMT,TNR,CTNNA2,KLHL29,TENM2,RBFOX3,DOCK1
EFO:0008422	Susceptibility to infectious disease measurement	13	431	0.69	0.0052	9606.ENSP00000268613,9606.ENSP00000285039,9606.ENSP00000323074,9606.ENSP00000345502,9606.ENSP00000352035,9606.ENSP00000352288,9606.ENSP00000360280,9606.ENSP00000372042,9606.ENSP00000384638,9606.ENSP00000407685,9606.ENSP00000427874,9606.ENSP00000430846,9606.ENSP00000463653	CDH13,MYO5B,RAI1,PDE4D,KCNQ2,PLXNB2,DAB1,PPP2R2C,CTNNA2,TNXB,TENM2,KCNB2,RBFOX3
EFO:0004870	Sleep measurement	23	868	0.64	4.04e-05	9606.ENSP00000264717,9606.ENSP00000268164,9606.ENSP00000268613,9606.ENSP00000270349,9606.ENSP00000285039,9606.ENSP00000300105,9606.ENSP00000333519,9606.ENSP00000345502,9606.ENSP00000348460,9606.ENSP00000360280,9606.ENSP00000376848,9606.ENSP00000381007,9606.ENSP00000384081,9606.ENSP00000385334,9606.ENSP00000389715,9606.ENSP00000420659,9606.ENSP00000427874,9606.ENSP00000430073,9606.ENSP00000430846,…	GCKR,ST8SIA2,CDH13,SLC6A3,MYO5B,CACNG2,SLC24A3,PDE4D,NPAS3,DAB1,PRIMA1,NAV3,EFR3B,MAD1L1,KSR2,KLHL29,TENM2,CNBD1,KCNB2,RBFOX3,EPB41L4A,CDH4,EYA1
EFO:0006527	Smoking status measurement	14	541	0.63	0.0092	9606.ENSP00000230658,9606.ENSP00000241305,9606.ENSP00000280886,9606.ENSP00000333519,9606.ENSP00000348460,9606.ENSP00000360280,9606.ENSP00000384638,9606.ENSP00000385334,9606.ENSP00000386908,9606.ENSP00000420659,9606.ENSP00000427874,9606.ENSP00000430073,9606.ENSP00000435509,9606.ENSP00000496255	ISL1,CPXM2,DIP2C,SLC24A3,NPAS3,DAB1,CTNNA2,MAD1L1,MEGF11,KLHL29,TENM2,CNBD1,ZIC4,EYA1
EFO:0006930	Brain volume measurement	14	608	0.58	0.0212	9606.ENSP00000268613,9606.ENSP00000270722,9606.ENSP00000280886,9606.ENSP00000345502,9606.ENSP00000348460,9606.ENSP00000353654,9606.ENSP00000360280,9606.ENSP00000381007,9606.ENSP00000385334,9606.ENSP00000399808,9606.ENSP00000423630,9606.ENSP00000435509,9606.ENSP00000435648,9606.ENSP00000484928	CDH13,PRDM16,DIP2C,PDE4D,NPAS3,COL4A2,DAB1,NAV3,MAD1L1,HOXC4,FBXL7,ZIC4,GRIK4,CDH4
EFO:0004875	Mathematical ability	15	732	0.53	0.0311	9606.ENSP00000268613,9606.ENSP00000321679,9606.ENSP00000333519,9606.ENSP00000345502,9606.ENSP00000352288,9606.ENSP00000360280,9606.ENSP00000365637,9606.ENSP00000385334,9606.ENSP00000401112,9606.ENSP00000407685,9606.ENSP00000420659,9606.ENSP00000421926,9606.ENSP00000427874,9606.ENSP00000435648,9606.ENSP00000484928	CDH13,ANKRD23,SLC24A3,PDE4D,PLXNB2,DAB1,KIAA1217,MAD1L1,SATB2,TNXB,KLHL29,UIMC1,TENM2,GRIK4,CDH4
EFO:0000719	Temporal measurement	27	1351	0.52	0.00025	9606.ENSP00000268613,9606.ENSP00000270722,9606.ENSP00000275493,9606.ENSP00000285039,9606.ENSP00000304437,9606.ENSP00000309794,9606.ENSP00000333519,9606.ENSP00000345502,9606.ENSP00000348460,9606.ENSP00000352288,9606.ENSP00000353654,9606.ENSP00000354511,9606.ENSP00000354772,9606.ENSP00000356646,9606.ENSP00000360280,9606.ENSP00000384638,9606.ENSP00000385334,9606.ENSP00000389715,9606.ENSP00000401112,…	CDH13,PRDM16,EGFR,MYO5B,KNDC1,TBC1D16,SLC24A3,PDE4D,NPAS3,PLXNB2,COL4A2,COMT,MVB12B,TNR,DAB1,CTNNA2,MAD1L1,KSR2,SATB2,KLHL29,UIMC1,TENM2,KCNB2,RBFOX3,CDH4,DOCK1,EYA1
EFO:0000246	Age	15	745	0.52	0.0340	9606.ENSP00000268613,9606.ENSP00000275493,9606.ENSP00000285039,9606.ENSP00000309794,9606.ENSP00000333519,9606.ENSP00000345502,9606.ENSP00000348460,9606.ENSP00000354772,9606.ENSP00000360280,9606.ENSP00000385334,9606.ENSP00000401112,9606.ENSP00000421926,9606.ENSP00000427874,9606.ENSP00000430846,9606.ENSP00000496255	CDH13,EGFR,MYO5B,TBC1D16,SLC24A3,PDE4D,NPAS3,MVB12B,DAB1,MAD1L1,SATB2,UIMC1,TENM2,KCNB2,EYA1
EFO:0011015	Educational attainment	19	1037	0.48	0.0178	9606.ENSP00000234961,9606.ENSP00000268613,9606.ENSP00000270722,9606.ENSP00000285039,9606.ENSP00000304437,9606.ENSP00000323074,9606.ENSP00000333519,9606.ENSP00000345502,9606.ENSP00000348460,9606.ENSP00000360280,9606.ENSP00000365637,9606.ENSP00000384638,9606.ENSP00000385334,9606.ENSP00000407685,9606.ENSP00000421926,9606.ENSP00000427874,9606.ENSP00000430073,9606.ENSP00000435648,9606.ENSP00000484928	OPRD1,CDH13,PRDM16,MYO5B,KNDC1,RAI1,SLC24A3,PDE4D,NPAS3,DAB1,KIAA1217,CTNNA2,MAD1L1,TNXB,UIMC1,TENM2,CNBD1,GRIK4,CDH4
EFO:0006848	Mental or behavioural disorder biomarker	28	1615	0.45	0.0012	9606.ENSP00000003084,9606.ENSP00000264717,9606.ENSP00000268613,9606.ENSP00000270722,9606.ENSP00000280886,9606.ENSP00000290913,9606.ENSP00000309794,9606.ENSP00000333519,9606.ENSP00000348460,9606.ENSP00000356652,9606.ENSP00000360280,9606.ENSP00000363583,9606.ENSP00000365637,9606.ENSP00000379008,9606.ENSP00000385334,9606.ENSP00000386908,9606.ENSP00000389715,9606.ENSP00000399808,9606.ENSP00000407685,…	CFTR,GCKR,CDH13,PRDM16,DIP2C,CHCHD6,TBC1D16,SLC24A3,NPAS3,CACYBP,DAB1,RASGEF1A,KIAA1217,SLC5A10,MAD1L1,MEGF11,KSR2,HOXC4,TNXB,KLHL29,TENM2,CNBD1,KCNB2,ZIC4,GRIK4,RBFOX3,EPB41L4A,CDH4
EFO:0006841	Respiratory disease biomarker	19	1142	0.44	0.0352	9606.ENSP00000264717,9606.ENSP00000264938,9606.ENSP00000268613,9606.ENSP00000270722,9606.ENSP00000290913,9606.ENSP00000333519,9606.ENSP00000345502,9606.ENSP00000348460,9606.ENSP00000352288,9606.ENSP00000353654,9606.ENSP00000356331,9606.ENSP00000372042,9606.ENSP00000385334,9606.ENSP00000389715,9606.ENSP00000399808,9606.ENSP00000423630,9606.ENSP00000427874,9606.ENSP00000435648,9606.ENSP00000463653	GCKR,SLC9A3,CDH13,PRDM16,CHCHD6,SLC24A3,PDE4D,NPAS3,PLXNB2,COL4A2,NR5A2,PPP2R2C,MAD1L1,KSR2,HOXC4,FBXL7,TENM2,GRIK4,RBFOX3
EFO:0004340	Body mass index	20	1257	0.42	0.0388	9606.ENSP00000264717,9606.ENSP00000268613,9606.ENSP00000300105,9606.ENSP00000323074,9606.ENSP00000348460,9606.ENSP00000352288,9606.ENSP00000354511,9606.ENSP00000360280,9606.ENSP00000366271,9606.ENSP00000381237,9606.ENSP00000384081,9606.ENSP00000384638,9606.ENSP00000385334,9606.ENSP00000386908,9606.ENSP00000389715,9606.ENSP00000427874,9606.ENSP00000430846,9606.ENSP00000463653,9606.ENSP00000484928,…	GCKR,CDH13,CACNG2,RAI1,NPAS3,PLXNB2,COMT,DAB1,KDM2B,HM13,EFR3B,CTNNA2,MAD1L1,MEGF11,KSR2,TENM2,KCNB2,RBFOX3,CDH4,DOCK1
EFO:0004464	Brain measurement	19	1174	0.42	0.0445	9606.ENSP00000268613,9606.ENSP00000270722,9606.ENSP00000275493,9606.ENSP00000280886,9606.ENSP00000345502,9606.ENSP00000348460,9606.ENSP00000353654,9606.ENSP00000360280,9606.ENSP00000372042,9606.ENSP00000381007,9606.ENSP00000384638,9606.ENSP00000385334,9606.ENSP00000399808,9606.ENSP00000423630,9606.ENSP00000427874,9606.ENSP00000435509,9606.ENSP00000435648,9606.ENSP00000484928,9606.ENSP00000500409	CDH13,PRDM16,EGFR,DIP2C,PDE4D,NPAS3,COL4A2,DAB1,PPP2R2C,NAV3,CTNNA2,MAD1L1,HOXC4,FBXL7,TENM2,ZIC4,GRIK4,CDH4,ARHGAP35
EFO:0003925	Cognition	21	1330	0.41	0.0340	9606.ENSP00000268613,9606.ENSP00000290913,9606.ENSP00000313243,9606.ENSP00000321679,9606.ENSP00000323074,9606.ENSP00000333519,9606.ENSP00000345502,9606.ENSP00000352288,9606.ENSP00000356331,9606.ENSP00000356646,9606.ENSP00000360280,9606.ENSP00000365637,9606.ENSP00000384638,9606.ENSP00000385334,9606.ENSP00000401112,9606.ENSP00000407685,9606.ENSP00000420659,9606.ENSP00000421926,9606.ENSP00000427874,…	CDH13,CHCHD6,HSF5,ANKRD23,RAI1,SLC24A3,PDE4D,PLXNB2,NR5A2,TNR,DAB1,KIAA1217,CTNNA2,MAD1L1,SATB2,TNXB,KLHL29,UIMC1,TENM2,GRIK4,CDH4
EFO:0004298	Cardiovascular measurement	34	2378	0.37	0.0030	9606.ENSP00000243108,9606.ENSP00000264717,9606.ENSP00000268613,9606.ENSP00000270349,9606.ENSP00000270722,9606.ENSP00000273814,9606.ENSP00000285039,9606.ENSP00000309794,9606.ENSP00000318944,9606.ENSP00000323074,9606.ENSP00000333519,9606.ENSP00000347548,9606.ENSP00000348460,9606.ENSP00000353654,9606.ENSP00000354511,9606.ENSP00000356331,9606.ENSP00000356646,9606.ENSP00000359532,9606.ENSP00000360280,…	HOXC6,GCKR,CDH13,SLC6A3,PRDM16,DGKQ,MYO5B,TBC1D16,TRAF7,RAI1,SLC24A3,RNF220,NPAS3,COL4A2,COMT,NR5A2,TNR,NTSR1,DAB1,ATP8A2,PPP2R2C,HM13,KCTD1,KSR2,HOXC4,TNXB,KLHL29,TENM2,KCNB2,MCF2L,RBFOX3,EPB41L4A,CDH4,EYA1
EFO:0005278	Cardiovascular disease biomarker measurement	31	2228	0.36	0.0104	9606.ENSP00000243108,9606.ENSP00000264717,9606.ENSP00000268613,9606.ENSP00000270349,9606.ENSP00000270722,9606.ENSP00000273814,9606.ENSP00000285039,9606.ENSP00000309794,9606.ENSP00000318944,9606.ENSP00000323074,9606.ENSP00000333519,9606.ENSP00000347548,9606.ENSP00000348460,9606.ENSP00000353654,9606.ENSP00000354511,9606.ENSP00000356646,9606.ENSP00000359532,9606.ENSP00000360280,9606.ENSP00000371070,…	HOXC6,GCKR,CDH13,SLC6A3,PRDM16,DGKQ,MYO5B,TBC1D16,TRAF7,RAI1,SLC24A3,RNF220,NPAS3,COL4A2,COMT,TNR,NTSR1,DAB1,ATP8A2,PPP2R2C,HM13,KCTD1,KSR2,HOXC4,TNXB,KLHL29,MCF2L,RBFOX3,EPB41L4A,CDH4,EYA1
EFO:0005105	Lipid or lipoprotein measurement	33	2526	0.33	0.0161	9606.ENSP00000264717,9606.ENSP00000268613,9606.ENSP00000270349,9606.ENSP00000273814,9606.ENSP00000285039,9606.ENSP00000304437,9606.ENSP00000311746,9606.ENSP00000323074,9606.ENSP00000345502,9606.ENSP00000353654,9606.ENSP00000354511,9606.ENSP00000356646,9606.ENSP00000359532,9606.ENSP00000360280,9606.ENSP00000365637,9606.ENSP00000371070,9606.ENSP00000372042,9606.ENSP00000376007,9606.ENSP00000376848,…	GCKR,CDH13,SLC6A3,DGKQ,MYO5B,KNDC1,KLK10,RAI1,PDE4D,COL4A2,COMT,TNR,NTSR1,DAB1,KIAA1217,ATP8A2,PPP2R2C,PNLDC1,PRIMA1,NAV3,HM13,CTNNA2,MEGF11,KSR2,HOXC4,TNXB,FBXL7,TENM2,RBFOX3,WTIP,CDH4,DOCK1,EYA1
EFO:0004529	Lipid measurement	31	2400	0.33	0.0264	9606.ENSP00000264717,9606.ENSP00000268613,9606.ENSP00000270349,9606.ENSP00000273814,9606.ENSP00000285039,9606.ENSP00000304437,9606.ENSP00000311746,9606.ENSP00000323074,9606.ENSP00000345502,9606.ENSP00000353654,9606.ENSP00000354511,9606.ENSP00000356646,9606.ENSP00000359532,9606.ENSP00000360280,9606.ENSP00000365637,9606.ENSP00000371070,9606.ENSP00000372042,9606.ENSP00000376848,9606.ENSP00000381007,…	GCKR,CDH13,SLC6A3,DGKQ,MYO5B,KNDC1,KLK10,RAI1,PDE4D,COL4A2,COMT,TNR,NTSR1,DAB1,KIAA1217,ATP8A2,PPP2R2C,PRIMA1,NAV3,HM13,CTNNA2,MEGF11,KSR2,HOXC4,TNXB,FBXL7,TENM2,RBFOX3,WTIP,CDH4,EYA1
EFO:0004324	Body weights and measures	47	4122	0.27	0.0067	9606.ENSP00000003084,9606.ENSP00000243108,9606.ENSP00000264717,9606.ENSP00000268613,9606.ENSP00000270722,9606.ENSP00000273814,9606.ENSP00000287777,9606.ENSP00000300105,9606.ENSP00000301712,9606.ENSP00000309336,9606.ENSP00000318944,9606.ENSP00000323074,9606.ENSP00000333519,9606.ENSP00000337731,9606.ENSP00000345502,9606.ENSP00000348416,9606.ENSP00000348460,9606.ENSP00000352288,9606.ENSP00000353654,…	CFTR,HOXC6,GCKR,CDH13,PRDM16,DGKQ,KLHL40,CACNG2,UNKL,HOXC5,TRAF7,RAI1,SLC24A3,CIDEB,PDE4D,TJP1,NPAS3,PLXNB2,COL4A2,COMT,NR5A2,DAB1,RASGEF1A,KIAA1217,KDM2B,NAV3,HM13,EFR3B,CTNNA2,MAD1L1,MEGF11,NFATC4,KSR2,GLI2,MAPKAPK3,HOXC4,SATB2,TNXB,KLHL29,UIMC1,TENM2,KCNB2,LTB4R2,RBFOX3,CDH4,DOCK1,EYA1
EFO:0004747	Protein measurement	57	5856	0.2	0.0253	9606.ENSP00000003084,9606.ENSP00000196371,9606.ENSP00000234961,9606.ENSP00000264717,9606.ENSP00000264938,9606.ENSP00000268613,9606.ENSP00000270722,9606.ENSP00000273814,9606.ENSP00000275493,9606.ENSP00000280886,9606.ENSP00000285039,9606.ENSP00000287777,9606.ENSP00000301712,9606.ENSP00000305302,9606.ENSP00000309794,9606.ENSP00000311746,9606.ENSP00000313243,9606.ENSP00000318944,9606.ENSP00000323074,…	CFTR,OXCT1,OPRD1,GCKR,SLC9A3,CDH13,PRDM16,DGKQ,EGFR,DIP2C,MYO5B,KLHL40,UNKL,SLC6A19,TBC1D16,KLK10,HSF5,TRAF7,RAI1,RPH3AL,IGDCC3,SLC24A3,PDE4D,RNF220,NPAS3,PLXNB2,COL4A2,COMT,NR5A2,NTSR1,DAB1,RASGEF1A,KIAA1217,ATP8A2,PPP2R2C,PNLDC1,QPRT,NAV3,HM13,CTNNA2,MAD1L1,MEGF11,KSR2,HOXC4,SATB2,TNXB,KLHL29,FBXL7,TENM2,MCF2L,ERFE,RBFOX3,EPB41L4A,CDH4,DOCK1,EYA1,ARHGAP35
